1 **Dynamic regulation of gonadal transposon control across the lifespan of the naturally**  
2 **short-lived African turquoise killifish**

3 Bryan B. Teefy<sup>1</sup>, Ari Adler<sup>1</sup>, Alan Xu<sup>1,2</sup>, Katelyn Hsu<sup>1,2</sup>, Param Priya Singh<sup>3</sup>, Bérénice A.  
4 Benayoun<sup>1,2,4,5,6,\*</sup>

5 <sup>1</sup> Leonard Davis School of Gerontology, University of Southern California, Los Angeles, CA  
6 90089, USA.

7 <sup>2</sup> Molecular and Computational Biology Department, USC Dornsife College of Letters, Arts  
8 and Sciences, Los Angeles, CA 90089, USA.

9 <sup>3</sup> Department of Genetics, Stanford University, Stanford, CA, USA

10 <sup>4</sup> Biochemistry and Molecular Medicine Department, USC Keck School of Medicine, Los  
11 Angeles, CA 90089, USA.

12 <sup>5</sup> USC Norris Comprehensive Cancer Center, Epigenetics and Gene Regulation, Los  
13 Angeles, CA 90089, USA.

14 <sup>6</sup>USC Stem Cell Initiative, Los Angeles, CA 90089, USA.

15 <sup>\*</sup>Corresponding author ([berenice.benayoun@usc.edu](mailto:berenice.benayoun@usc.edu)).

16

17 **Abstract**

18           Although germline cells are considered to be functionally “immortal”, both the  
19 germline and supporting somatic cells in the gonad within an organism will experience aging.  
20 With increased age at parenthood, the age-related decline in reproductive success has  
21 become an important biological issue for an aging population. However, molecular  
22 mechanisms underlying reproductive aging across sexes in vertebrates remain poorly  
23 understood. To decipher molecular drivers of vertebrate gonadal aging across sexes, we  
24 perform longitudinal characterization of the gonadal transcriptome throughout lifespan in the  
25 naturally short-lived African turquoise killifish (*Nothobranchius furzeri*). By combining mRNA-  
26 seq and small RNA-seq from 26 individuals, we characterize the aging gonads of young  
27 adult, middle-aged, and old female and male fish. We analyze changes in transcriptional  
28 patterns of genes, transposable elements (TEs), and piRNAs. We find that testes seem to  
29 undergo only marginal changes during aging. In contrast, in middle-aged ovaries, the  
30 timepoint associated with peak female fertility in this strain, PIWI pathway components are  
31 transiently downregulated, TE transcription is elevated, and piRNA levels generally  
32 decrease, suggesting that egg quality may already be declining at middle-age. Furthermore,  
33 we show that piRNA ping-pong biogenesis declines steadily with age in ovaries, while it is  
34 maintained in aging testes. To our knowledge, this dataset represents the most  
35 comprehensive transcriptomic dataset for vertebrate gonadal aging. This resource also  
36 highlights important pathways that are regulated during reproductive aging in either ovaries  
37 or testes, which could ultimately be leveraged to help restore aspects of youthful  
38 reproductive function.

39

## 40 **Introduction**

41           In much of the industrialized world, parental age is increasing making fertility-related  
42 challenges associated with later-life childbearing increasingly relevant (Kenny et al. 2013;  
43 Bertoldo et al. 2020). In humans, oocyte quality begins to rapidly degrade around 30 years  
44 old while menopause, the irreversible loss of female fertility, occurs around 50 years old  
45 (Alberts et al. 2013; Finch 2014). In contrast, while male fertility gradually declines with age,  
46 complete loss of testicular function is not a feature of male reproductive aging (Gunes et al.  
47 2016). Mammals, as well as birds, are exceptional among vertebrates as these groups  
48 produce a finite supply of oocytes before or shortly after birth ensuring that any species that  
49 lives long enough should eventually deplete its oocytes, although the starting supply of  
50 oocyte greatly outnumbers the final number of oocytes that will be ovulated (Mira 1998).  
51 However, there are many other mechanisms that influence reproductive decline, such as  
52 neuroendocrine aging, that occur in both sexes and are widely conserved among vertebrates  
53 (Perheentupa and Huhtaniemi 2009). Thus, leveraging a tractable vertebrate model  
54 organism to understand molecular mechanisms underlying reproductive aging will provide  
55 important insights into lifelong regulation of reproductive function.

56           To study reproductive aging, we examined the impact of aging on testes and ovaries  
57 in the African Turquoise Killifish *Nothobranchius furzeri*, the shortest-lived vertebrate that  
58 can be bred in captivity, with a lifespan of about 4-6 months (Hu and Brunet 2018). The  
59 turquoise killifish evolved this short lifespan in response to their unique lifecycle, which  
60 revolves around the formation of ephemeral ponds of water (Kim et al. 2016). Depending on  
61 the specific species, killifish can become sexually mature as early as two weeks post-  
62 hatching, although most killifish become sexually mature around 4-5 weeks of age, the  
63 fastest known time to sexual maturation of any vertebrate (Naumann and Englert 2018;  
64 Vrtilik et al. 2018b). Killifish are asynchronous breeders, and upon sexual maturity, females  
65 continuously undergo oogenesis and lay eggs, typically on a daily basis (Terzibasi Tozzini  
66 and Cellerino 2020). While male reproductive senescence may be negligible, females do  
67 experience an age-related decline in fecundity, though the molecular mechanisms

68 contributing to reproductive aging in either sex have not been elucidated (Vrtilek et al.  
69 2018a; Zak and Reichard 2021). Importantly, we and others have helped establish a key  
70 functional genomics toolkit for this species, making it a uniquely tractable experimental  
71 model to decipher molecular mechanisms driving aspects of aging (Valenzano et al. 2011;  
72 Reichwald et al. 2015; Valenzano et al. 2015; Harel et al. 2016; Willemsen et al. 2020).

73 An emerging facet of vertebrate aging is the reactivation of transposable elements  
74 (TEs) with aging in somatic tissues (De Cecco et al. 2013; Chen et al. 2016; Simon et al.  
75 2019; LaRocca et al. 2020; Yang et al. 2022). However, whether TEs also transcriptionally  
76 activate within the aging gonad, which is uniquely protected from spurious TE mobilization  
77 by the PIWI-piRNA pathway, has been largely unexplored in a vertebrate system. The PIWI  
78 pathway is an Argonaute-based small RNA pathway that maintains germline genomic  
79 integrity by antagonizing the mobilization of transposable elements (TEs) through  
80 complementary RNA base-pairing and TE RNA target degradation during gametogenesis  
81 and embryogenesis. PIWI family proteins bind 24-35 nucleotide (nt) PIWI-interacting RNAs,  
82 or piRNAs, which are complementary to or derived from TEs. piRNAs are expressed  
83 primarily in the gonad and are distinctly larger than miRNAs (Mani and Juliano 2013; Czech  
84 and Hannon 2016). Once bound to an RNA target, PIWI proteins cleave the RNA target  
85 precisely 10 nts from the 5' end of the complementary piRNA (Mani and Juliano 2013; Czech  
86 and Hannon 2016). To date, most studies examining the impact of aging on the PIWI  
87 pathway have focused on invertebrate model organisms, such as the fly *Drosophila*  
88 *melanogaster* (Sousa-Victor et al. 2017; Yamashiro and Siomi 2018; Lin et al. 2020). For  
89 instance, Piwi expression is required to suppress TE expression, reduce DNA damage, and  
90 maintain intestinal stem cell lineages in the aging *Drosophila* midgut (Sousa-Victor et al.  
91 2017). In the fly ovary, age-related decline in *Piwi* expression in the cells of the germline  
92 stem cell niche results in a transposon de-repression and a loss of germline stem cells  
93 (GSCs) (Lin et al. 2020). In contrast to the germline stem cell niche, the expression of PIWI  
94 pathway components in whole *Drosophila* egg chambers increases with age, although this is  
95 not associated with any global changes in TE expression (Erwin and Blumenstiel 2019).

96 Whether TEs are derepressed with age in the vertebrate gonad and whether TE expression  
97 is modulated by age-related PIWI dynamics remains unknown. Thus, it will be important to  
98 determine whether PIWI regulation (and concomitant TE control) in the aging gonad may  
99 influence reproductive aging.

100 In this study, we leverage mRNA and small RNA sequencing to capture the  
101 transcriptional trajectory of gonadal aging in a naturally short-lived vertebrate. To do so, we  
102 characterize the transcriptome of African turquoise killifish ovaries and testes in young adults  
103 (5 weeks), middle-age (10 weeks) and old (15 weeks) animals in the GRZ inbred lab strain.  
104 In particular, we focus on the interplay of TEs and piRNAs, and assess the effect of age on  
105 the transcriptional status of these classes of RNAs.

106

## 107 **Results**

### 108 *Lifespan, reproductive, and transcriptomic landscapes of the aging gonad in the African* 109 *turquoise killifish*

110 To understand how gonads are affected during aging in a vertebrate model  
111 organism, we performed a study of ovarian and testicular landscapes throughout aging in  
112 African turquoise killifish from the GRZ strain (**Fig. 1A**). In our housing conditions (see  
113 Methods), 15 weeks correspond to ~90% survival for both female and male animals (**Fig.**  
114 **1B; Supplemental Table S1A**), although GRZ females lived significantly longer than males  
115 in our husbandry conditions ( $p = 0.002$ , log Rank test; see Methods) (**Fig. 1B**). To determine  
116 the effect of aging on the vertebrate gonadal transcriptomic landscape, we collected ovaries  
117 and testes from  $N = 5$  GRZ female and male African turquoise killifish at three different time  
118 points post-hatching: young adulthood (5 weeks; onset of fertility), middle-age (10 weeks),  
119 and old age (15 weeks; before any dramatic population survival decrease) (**Fig. 1A**). The  
120 choice of these specific time points is consistent with broadly accepted guidelines in aging  
121 research, to avoid measuring development or survivorship bias (Flurkey et al. 2007) (see  
122 methods). In the highly inbred GRZ strain of African turquoise killifish, fecundity was reported  
123 to peak around 10-12 weeks of age (Zak and Reichard 2021), roughly corresponding to the  
124 middle-age time point that we selected. Only samples with intact RNA ( $RIN >7$ ) were  
125 processed further to eliminate biases linked to RNA degradation, yielding 14 female samples  
126 and 12 male samples, leaving at least 4 samples per biological group (**Supplemental Fig.**  
127 **S1A**). We performed (i) mRNA transcriptome characterization (*i.e.* mRNA-seq using polyA  
128 selection), analyzing both transcriptional patterns of genes and transposable elements [TEs],  
129 and (ii) small-RNA transcriptome characterization (*i.e.* small RNA-seq), focusing on piRNAs,  
130 the germline-specific class of small RNAs of the PIWI pathway (**Fig. 1A** and **Supplemental**  
131 **Fig. S1A**).

132 To globally visualize the similarity of the transcriptomic landscapes of aging ovaries  
133 and testes at multiple levels of regulation, we used principal component analysis [PCA] (**Fig.**  
134 **1C-E**). PCA analysis of genic mRNA, TE mRNA, and TE-targeting piRNA expression

135 revealed that the main source of variation [PC1] corresponded to gonadal identity (*i.e.* ovary  
136 vs. testis), although animal age also weakly separated samples for mRNA and piRNA cluster  
137 (but not TEs) transcription on PC2 (**Fig. 1C-E**). Notably, despite genomic TE content being a  
138 fixed feature for the species, we observed clear sex-dimorphism in the transcriptional  
139 landscape of TEs and associated piRNAs in the turquoise killifish gonads. These  
140 observations are consistent with deeply sex-dimorphic transcriptional programs in the gonad  
141 at the level of mRNAs, TEs and small RNAs, and are consistent with a recent study in young  
142 *Drosophila* ovaries and testes (Chen et al. 2021). Separately, we analyzed the ovarian and  
143 testicular transcriptomes to uncover potential sex-specific transcriptional patterns with aging  
144 (**Supplemental Fig. S1B-S**; see supplementary methods). Using PCA, we noted that  
145 middle-aged female expression data clustered distinctly for all analyzed RNA species in PC1  
146 (**Supplemental Fig. S1B-D**). This observation may reflect the outsized contribution of a  
147 transcriptional program associated with oogenesis, or fertility more broadly, to the  
148 expression profiles of all RNA species assayed at this timepoint. Intriguingly, female piRNA  
149 expression data segregated most strongly by age, suggesting that the small RNA program in  
150 the ovary is most sensitive to aging (**Supplemental Fig. S1D**). In contrast, the male  
151 transcriptomic data did not visually separate strongly by age (**Supplemental Fig. S1E-G**).

152 Consistent with our PCA results, we noted stronger clustering of samples by age for  
153 ovaries compared to testes for gene, TE and piRNA expression using hierarchical clustering  
154 with bootstrap resampling by 'pvclust' (Suzuki and Shimodaira 2006) (**Supplemental Fig.**  
155 **S1H-M**; see supplementary methods). Finally, we also quantified the proportion of gene, TE  
156 and piRNA expression variance explained by age in the ovaries and testes using the  
157 'variancePartition' framework (Hoffman and Schadt 2016) (**Supplemental Fig. S1N-S**; see  
158 supplementary methods). Importantly, the median percentage of variance explained by age  
159 was systematically higher in ovaries than testes (genes: ~25% vs. ~6%; TEs: ~15% vs. ~6%;  
160 piRNAs: ~49% vs. ~2% ; **Supplemental Fig. S1N-S**). Together, our observations suggest  
161 that testicular identity and function are more stable in response to organismal aging relative  
162 to the ovary. Interestingly, our results are reminiscent of a microarray analysis of gonadal

163 aging in mice, where ovaries underwent substantially more transcriptional changes with  
164 aging than testes (Sharov et al. 2008). Our transcriptomic data is also consistent with  
165 observations of negligible male reproductive aging in this species (Vrtilek et al. 2018a; Zak  
166 and Reichard 2021). Together, our data suggests unique changes in the transcriptional  
167 landscapes of ovaries versus testes throughout aging.

168

### 169 *Aging differentially impacts gene expression in turquoise killifish ovaries and testes*

170 Since aging is often a non-linear process, at least in somatic tissues (Baumgart et al.  
171 2016; Rosenberg et al. 2021), we decided to determine differential gene expression with  
172 aging within the DEseq2 framework using a likelihood ratio testing [LRT] approach, so as to  
173 unbiasedly identify patterns of differential gene expression in ovary and testis aging (Love et  
174 al. 2014). To note, since LRT can be overly lenient (Core 2021), we used a stringent False  
175 Discovery Rate [FDR] threshold of  $FDR < 1e-6$  to identify differentially expressed transcripts.  
176 Significantly regulated transcripts were then assigned to patterns using 'degPatterns' from  
177 the 'DEGreport' R package (Pantano 2022), which uses hierarchical clustering of gene  
178 expression to identify shared significant patterns of expression among differentially  
179 expressed genes in an unsupervised fashion. This unbiased approach detected four major  
180 differential patterns corresponding to transcripts whose expression is (a) transiently down at  
181 middle-age, (b) transiently up at middle-age, (c) monotonously down with age, or (d)  
182 monotonously up with age (**Fig. 2A-B, 3A, and Supplemental Fig. S2A, S3A;**  
183 **Supplemental Table S2A-B,D**). For reading convenience, we label these age-related  
184 patterns of differential expression hereafter as (a), (b), (c) and (d) whenever they arise from  
185 the unsupervised 'degPatterns' clustering. Intriguingly, we noted the majority of differentially  
186 expressed genes showed transient changes at middle-age in both ovaries and testes  
187 (respectively 1931 out of 2041, and 578 out of 603 differentially expressed genes), rather  
188 than linear trends with age. This trend suggests that most of the transcriptional variation in  
189 gonadal gene expression occurs at middle-age when fertility, at least in females, is at its



190 peak. This observation is interesting, because it suggests that gonadal biology is already  
191 substantially impacted in middle-age healthy animals.

192         Next, we asked which biological functions were associated with each of these gene  
193 expression patterns with gonadal aging. For this purpose, we performed Gene Ontology  
194 [GO] Enrichment Analysis for each age-regulated pattern in ovaries and testes (Falcon and  
195 Gentleman 2007) (**Fig. 2C, 3B, and Supplemental Fig. S2B, S3B; Supplemental Table**  
196 **S3A-F**). First, we examined enrichment for terms in the “Biological Process” GO category  
197 (**Fig. 2C, 3B; Supplemental Table S3A,D**). Interestingly, genes downregulated in middle-  
198 aged ovaries were enriched most strongly for “piRNA metabolic process” (*i.e.* pattern a;  
199 GO:0034587; **Fig. 2C; Supplemental Table S3A**). Specifically, genes transcriptionally  
200 downregulated in middle-age ovaries include the genes encoding both effector PIWI proteins  
201 (*i.e.* the turquoise killifish homologs to human *PIWIL1* and *PIWIL2*), is consistent with overall  
202 decreased TE processing capacity. To note, as seen in **Supplemental Table S1C**, genes  
203 belonging to the “piRNA metabolic process” GO terms are, as expected, robustly expressed  
204 in killifish gonads throughout life.

205         Intriguingly, in zebrafish, the gene encoding PIWIL1, the primary catalytic protein of  
206 the PIWI pathway, is expressed most highly in developing germline stem cells before  
207 expression decreases in more mature oocytes (Liu et al. 2022), which could indicate a  
208 higher ratio of mature oocytes to developing germline stem cells in middle-aged killifish  
209 ovaries compared to young and old ovaries. Thus, downregulation of PIWI-related genes at  
210 mid-age may be related to differences in mature oocytes content. To test this hypothesis, we  
211 performed (i) a small-scale histological analysis of oocyte diameter in ovaries from fish at  
212 different ages (since oocyte size is directly linked to maturation) (Api et al. 2018)  
213 (**Supplemental Fig. S4A-B**; see supplementary methods), and (ii) used a bulk transcriptome  
214 deconvolution approach using a zebrafish single-cell RNA-seq dataset of young adult  
215 ovaries as a reference dataset (**Supplemental Fig. S4C-G**; see supplementary methods).  
216 First, histological analysis revealed that the diameter distribution of oocytes in aging African  
217 turquoise killifish ovaries, measured by 4 independent blinded observers, did not vary

218 significantly with age (**Supplemental Fig. S4B**). Second, whereas genes encoding PIWI-  
219 related are sharply downregulated at middle-age, deconvolution analysis did not detect  
220 substantial changes at middle-age in the proportion of immature germ cells in young vs.  
221 middle-aged turquoise killifish ovaries (**Supplemental Fig. S4F,G**). Thus, it is unlikely that  
222 observed bulk transcriptome changes in the expression of genes involved in piRNA  
223 metabolism in the middle-aged killifish ovary reflect substantial changes in the underlying  
224 ovarian composition of oocyte maturation stages. Alternatively, this may also suggest that  
225 there is a relaxation of piRNA-mediated TE expression control in ovaries at middle-age in the  
226 African turquoise killifish (see below). Other terms enriched for genes downregulated in  
227 middle-age ovaries were largely related to egg maturation and egg-specific processes (*e.g.*  
228 zona pellucida and regulation of acrosome reaction; **Fig. 2C**), consistent with the notion that  
229 ovarian function (and oocyte quality) may have already started to decline at middle-age in  
230 the African turquoise killifish.

231 Genes that were upregulated in middle-aged ovaries were enriched for terms related  
232 to RNA metabolism, consistent with conserved importance of maternally deposited RNAs in  
233 oocytes (*i.e.* pattern b; **Fig. 2C**). Genes that were linearly downregulated with age in the  
234 ovaries were enriched for terms relating to extracellular matrix organization (*i.e.* pattern c;  
235 **Fig. 2C**). Finally, genes that were upregulated with age in the ovaries included those  
236 involved in immune responses and ion homeostasis (*i.e.* pattern d; **Fig. 2C**), which may  
237 relate to overall increases in inflammation with aging that has been observed in somatic  
238 tissues (Benayoun et al. 2019). Increased expression of inflammatory genes has also been  
239 observed in the transcriptome of aging mouse ovaries (Sharov et al. 2008). We also  
240 performed a similar functional enrichment analysis using terms from the "Cellular  
241 Component" (**Supplemental Fig. S2B; Supplemental Table S3B**). and "Molecular  
242 Function" (**Supplemental Table S3C**).GO categories, with largely consistent trends.

243 In aging testes, we observed the emergence of a similar trend, with most differential  
244 genes being regulated at middle-age (*i.e.* patterns a and b), and few genes linearly regulated  
245 with aging (*i.e.* patterns c and d; **Fig. 3A; Supplemental Table S3D**). Genes transiently

246 downregulated at middle-age were enriched for terms relating to vascular development  
247 (pattern a; **Fig. 3B**). This observation suggests that the vasculature of the testis may be  
248 actively remodeled, consistent with known unique vascular requirements for testicular  
249 function (Sargent et al. 2015). Genes transiently upregulated at middle-age included those  
250 involved in spermatogenesis, e.g. "axoneme assembly" and "cilium movement", consistent  
251 with peak spermatogenesis potentially occurring at this stage (pattern b; **Fig. 3B**). Lastly,  
252 genes that were downregulated linearly with age were heavily enriched for steroid  
253 biosynthesis related terms, suggestive of a steady decline in steroid biosynthesis in the  
254 aging gonad (pattern c; **Fig. 3B**). Interestingly, this transcriptional downregulation of steroid  
255 biosynthesis genes is consistent with a recent mass-spectrometry study that detected  
256 significantly decreased levels of sex-steroids in the testes of aging turquoise killifish  
257 (Dabrowski et al. 2020). "Cellular component" analysis again corroborated the GO  
258 "Biological Process" analysis, especially with regards to sperm-related terms being  
259 upregulated at middle-age (**Supplemental Fig. S3B; Supplemental Table S3E**). Terms  
260 downregulated at middle-age included those associated with heterochromatin and  
261 extracellular vesicles, while terms downregulated linearly with age are enriched for  
262 mitochondrial and collagen related terms (**Supplemental Fig. S3B; Supplemental Table**  
263 **S3E**).

264 Together, our results show that the African turquoise killifish gonadal transcriptional  
265 landscapes are broadly remodelled at middle-age, highlighting the need to include middle-  
266 age time points in such analyses to get a full view of age-related trajectories. Notably, the  
267 largest changes in gene expression seem to align with the window of peak fertility and egg  
268 production in this species, suggesting that egg quality may start declining at middle-age  
269 despite high egg output.

270

271 *Transposon expression is age- and sex-dependent in the turquoise killifish gonad*

272 Next, we asked whether control of TE transcription may be impacted during gonadal  
273 aging in the turquoise killifish. Indeed, accumulating evidence has shown that TE expression

274 tends to increase with age in somatic tissues across species (De Cecco et al. 2013; Chen et  
275 al. 2016; Benayoun et al. 2019; Simon et al. 2019; Bravo et al. 2020; LaRocca et al. 2020;  
276 Yang et al. 2022). Although TE control is especially important in the germline to maintain  
277 genome stability throughout generations, whether TE expression escapes control in gonadal  
278 tissues with vertebrate aging has not yet been investigated. Interestingly, a recent genomic  
279 analysis of several species of African killifishes suggests that the shorter-lived killifish  
280 species have been accumulating TEs in their genomes, suggesting that short-lived/annual  
281 killifish species, such as the African turquoise killifish, may not efficiently repress germline  
282 TE activity throughout life (Cui et al. 2020).

283 To determine whether global changes in TE expression can indeed occur in aging  
284 killifish gonads, we first analyzed what proportion of mapped reads in our mRNA-seq dataset  
285 were derived from TE sequences (**Fig. 4A-B**). TE-derived sequences represented  
286 approximately 7-11% of reads in turquoise killifish ovaries and testes (**Fig. 4B**). Interestingly,  
287 global levels of TE-derived mRNA sequences were stable between young and middle-aged  
288 ovaries, but significantly dipped in old ovaries, whereas they tended to proportionally  
289 increase with age in testes (**Fig. 4B**). Such a pattern may reflect the process of  
290 gametogenesis, wherein the epigenome is repatterned, resulting in TE reactivation (Ben  
291 Maamar et al. 2021), despite the expected antagonizing effects of the PIWI pathway on TE  
292 expression in the germline.

293 Next, we asked whether TE transcription was changed with aging in ovaries and  
294 testes at the level of each subfamily. We identified differentially expressed TE transcripts  
295 using our mRNA-seq analysis pipeline (FDR < 1e-6, as above; **Fig. 4A,C,D** and  
296 **Supplemental Fig. S5A-B; Supplemental Table S4A-B**). Similar to our differential gene  
297 expression analysis, we observed that most significant changes in TE expression levels  
298 occurred in middle-aged gonads (*i.e.* patterns a and b; **Fig. 4C,D** and **Supplemental Fig.**  
299 **S5A,B**). In the ovary, 6 TEs were downregulated only at middle-age (pattern a), and 248  
300 TEs were specifically upregulated at middle-age (pattern b; **Fig. 4C** and **Supplemental Fig.**  
301 **S5A**). These age-regulated TEs seem to belong to families broadly representative of the

302 overall turquoise killifish genomic TE content, with a predominance of LINE sequences,  
303 suggestive of general relaxation of TE control (**Fig. 4C,D**). Interestingly, this timepoint  
304 coincides with the functional enrichment for "piRNA metabolic process" for genes  
305 downregulated in middle-age ovaries (**Fig. 2C**). Thus, the transcriptional upregulation of TEs  
306 in the middle age ovary may reflect an unfavorable reactivation of certain TE species in  
307 response to the transient decline in PIWI pathway activity. Such an increase in TE  
308 transcription, even in the context of mature oocytes, is expected to be deleterious to oocyte  
309 health (Malki et al. 2014). No significant TEs were linearly downregulated or upregulated  
310 with age in the ovaries (*i.e.* patterns c and d, respectively; **Fig. 4C** and **Supplemental Fig.**  
311 **S5A**). In the aging testes, only 25 TEs passed our differential expression threshold (FDR <  
312 1e-6), and they were all upregulated at middle-age (pattern b; **Fig. 4D** and **Supplemental**  
313 **Fig. S5B**). No significant TEs were downregulated at middle-age or linearly with age in the  
314 testes (*i.e.* patterns a, c, and d, respectively; **Fig. 4D** and **Supplemental Fig. S5B**). A burst  
315 of TE transcription in middle-age gonads could reflect peak fertility and gamete output,  
316 where a higher proportion of germ cells are undergoing epigenetic repatterning to yield  
317 increased numbers of mature gametes. Alternatively, increased TE transcription may reflect  
318 a relaxation of genome surveillance mechanisms, ultimately leading to decreased gamete  
319 quality and survivability.

320

321 *piRNAs and the PIWI pathway activity are regulated throughout life in turquoise killifish*  
322 *gonads*

323 Thus far, we have found that: (i) genes encoding the key components of the PIWI  
324 pathways are robustly expressed throughout life in turquoise killifish ovaries and testes  
325 (**Supplemental Table S1C; Fig. 5A**), (ii) PIWI pathway genes are downregulated in ovaries  
326 at middle-age (**Fig. 5A** and **2C**), and (iii) transcription of TEs is globally regulated with  
327 gonadal aging (**Fig. 4B**), with several TE subfamilies transcriptionally specifically  
328 upregulated in middle-age ovaries and, to a lesser extent, middle-age testes (**Fig. 4C,D**).

329 Thus, we reasoned that underlying changes in piRNA abundances throughout aging may  
330 drive changes in TE transcriptional levels.

331 To analyze PIWI pathway activity in ovaries and testes throughout turquoise killifish  
332 life, we generated small RNA sequencing libraries from the same samples used for mRNA-  
333 seq (**Fig. 1A, Supplemental Fig. S1A**). We leveraged these libraries to annotate piRNA  
334 clusters and evaluate piRNA expression throughout life in the African turquoise killifish  
335 gonads. First, to computationally isolate piRNAs from our small RNA-seq library, we used a  
336 size filter of 24-35 nucleotides, which was previously shown to efficiently capture piRNAs  
337 and separate them from miRNAs (Gong et al. 2018; Huang et al. 2019) (**Supplemental Fig.**  
338 **S6A**). Consistent with the resulting reads deriving from piRNAs, the resultant nucleotide  
339 composition showed the expected strong 1U bias in both types of gonads (Thomson and Lin  
340 2009) (**Fig. 5B**). In addition, these piRNA-derived reads seemed to arise from 222 unique  
341 piRNA clusters in the turquoise killifish genome, as identified by Protrac (Rosenkranz and  
342 Zischler 2012). Importantly, the predicted TE content of the identified piRNA clusters is  
343 remarkably reflective of the annotated genomic TE content (**Fig. 5C**), consistent with the co-  
344 evolution between the TE invasion of the genome and the genomic defense against TE  
345 activity. In contrast to mice, in which ovarian piRNAs are rare and the PIWI pathway is  
346 broadly believed to be non-essential (Watanabe et al. 2008), turquoise killifish ovaries seem  
347 to express the components of PIWI pathway throughout life and are replete with piRNAs.  
348 This may be the result of continuous oocyte production in the killifish ovary since PIWI is  
349 required during oogenesis (Thomson and Lin 2009; Ketting 2011; Roovers et al. 2015).

350 Since piRNAs will align almost exclusively to TE sequences, we modelled piRNA  
351 abundance dynamics by performing differential expression analysis on TEs using counts  
352 from the piRNAs mapping to TE sequences embedded within the genome. This approach  
353 enables us to distinguish which TE species are differentially targeted by the PIWI pathway in  
354 turquoise killifish gonads as a function of age. As piRNA biogenesis is expected to at least  
355 partially be a response to TE activity, TE-specific piRNA counts should positively correlate  
356 with expressed TE species. Indeed, we observed a strong positive correlation between the

357 mRNA levels of TEs and the abundance of cognate piRNAs in each biological group  
358 (Spearman Rank correlation  $Rho \geq 0.66$ ; **Supplemental Fig. S6B,C**). Similar to  
359 transcriptional patterns observed in our genic and TE data, the bulk of differential piRNA  
360 expression occurred at middle-age in ovarian tissue (pattern a; **Fig. 5D** and **Supplemental**  
361 **Fig. S6D**; **Supplemental Table S5A**). However, mirroring the TE transcriptional changes  
362 where many TE species were upregulated in the middle-age ovaries (**Fig. 4C**), the majority  
363 of differentially abundant piRNAs were downregulated at middle-age in the ovaries (**Fig. 5D**),  
364 consistent with downregulation of the PIWI pathway genes (**Fig. 2C** and **5A**). Importantly,  
365 there was significant overlap between TEs that were specifically upregulated in middle-age  
366 ovaries and TEs targeted by piRNAs with decreased piRNA abundance in middle age  
367 ovaries ( $p = 9.08E-3$  in Fisher's exact test; **Fig. 5F**), consistent with the notion of a partial  
368 relaxation of piRNA-mediated TE repression in middle-age ovaries. Testis piRNA expression  
369 was not as strongly regulated with age as compared to that of ovaries, with few age-  
370 regulated piRNA species, most of which showed increased expression with age (pattern d;  
371 **Fig. 5E** and **Supplemental Fig. S6E**).

372

373 *Ping-Pong activity declines with age in oocytes, remains stable in testes*

374 In the presence of a particular TE mRNA, the PIWI pathway initializes catalytic  
375 degradation of the TE transcript guided by TE-complementary "primary" piRNA sequences,  
376 which triggers the production of additional "secondary" piRNA sequences that specifically  
377 target the active TE sequence (Czech and Hannon 2016). This mechanism of piRNA  
378 synthesis through amplification of piRNA populations corresponding to actively transcribed  
379 TEs is known as "ping-pong" biogenesis (Czech and Hannon 2016) (**Fig. 6A**). Effectively,  
380 ping-pong biogenesis is an adaptive mechanism by which the PIWI pathway defends the  
381 germline against active TE threats (Czech and Hannon 2016). Due to the annealing  
382 requirements between primary piRNA sequences, target TE mRNAs, and TE-derived  
383 secondary piRNAs, a signature of ping-pong biogenesis is a 10 bp overlap between the 5'  
384 ends of opposite orientation piRNAs (Wang et al. 2015) (**Fig. 6A** and **Supplemental Fig.**

385 **S7A-B**). This ping-pong biogenesis mechanism can be measured globally or at the level of a  
386 specific TE sequence.

387 We first used the PPMeter tool from the Protrac software suite to globally measure  
388 ping-pong biogenesis rates in each biological group (Jehn et al. 2018) (**Fig. 6B**). This tool  
389 calculates the instances of 10 bp overlaps out of every million overlap pairs assayed to  
390 report the relative fraction of reads engaged in active ping-pong within a given piRNA  
391 sequencing library. We used this tool for each biological replicate with 100 bootstraps and  
392 report the median values in each biological sample over bootstrap samples (**Fig. 6B**). In  
393 parallel, we also used an independent method in which, for each consensus TE sequence,  
394 we computed  $Z_{10}$  scores, a standard measure of ping-pong activity defined as the Z-score of  
395 the 10 bp overlap frequencies between opposite orientation piRNAs within a 20bp window  
396 (Han et al. 2015; Vandewege et al. 2022). For each replicate, we took the median  $Z_{10}$  score  
397 over all detected TE sequences to assess ping-pong at a global scale (**Fig. 6C**).  
398 Convincingly, both orthogonal methods revealed a steady decrease of the piRNA population  
399 participating in ping-pong biogenesis with aging in the ovaries, whereas this fraction  
400 remained relatively stable in the testes (**Fig. 6C**). The age-related decline in ovarian ping-  
401 pong activity may be related to a decrease in piRNA processing component expression  
402 starting at middle age (**Fig. 5A**). This trend could result in a decrease in the ability of the  
403 PIWI pathway to control TE transcription levels with ovarian aging. Alternatively, this steady  
404 decrease with aging in ovarian ping-pong biogenesis may reflect the interplay of (i) a  
405 decreased efficiency of the PIWI pathway at middle-age (**Fig. 2C, 5A**), and (ii) an overall  
406 decrease of TE transcription levels in old ovaries (**Fig. 4B**). Meanwhile, the observed steady  
407 global ping-pong rates in testes are consistent with relatively stable TE and piRNA  
408 expression dynamics relative to ovaries that we observed (**Fig. 4D, 5E**).

409 We were curious whether ping-pong biogenesis may be differentially regulated for  
410 each consensus TE sequence. For this purpose, we further examined the consensus TE  $Z_{10}$   
411 data at the consensus TE transcript level. We used an ANOVA-based analysis to determine  
412 which TEs have differential levels of ping-pong activity as measured by  $Z_{10}$  scores with aging



413 in ovaries and testes (**Fig. 6D-F** and **Supplemental Fig. S7C-D**). Then, TEs with significant  
414 age-related changes in ping-pong biogenesis were clustered into patterns, similar as before  
415 using the 'degPatterns' paradigm (**Fig. 2A, 6D**). This analysis identified TEs with ping-pong  
416 biogenesis levels corresponding to previously described patterns b, c and d. In addition, it  
417 identified 2 significant patterns for TEs with decreased ping-pong biogenesis at middle-age  
418 (the pattern previously designated as (a)): ( $a_1$ ) with maximal ping-pong biogenesis in the  
419 young gonad, or ( $a_2$ ) maximal ping-pong biogenesis in the old gonad. Interestingly, most of  
420 the TEs showing differential ping-pong levels in the ovaries showed significantly decreased  
421 ping-pong with aging (pattern c; **Fig. 6E** and **Supplemental Fig. S7C**), consistent with the  
422 global ping-pong trends (**Fig. 6B,C**). In the testes, 82 TEs show differential ping-pong scores  
423 but without a clear global age-related trend, possibly reflecting a more robust PIWI activity  
424 throughout life (**Fig. 6F** and **Supplemental Fig. S7D**). In summary, multiple methods of  
425 analysis show ping-pong activity progressively wanes in the aging ovary, but remains steady  
426 in the testes which may be reflective of respective gametogenesis rates in the female versus  
427 male gonads throughout life.

428

429

430 **Discussion**

431 *A resource for the study of reproductive aging in vertebrates*

432         The germline is considered an immortal cell lineage but the somatic cells that  
433 comprise and support the germline are affected by aging. In this study, we examined how  
434 aging affects the female and male gonads of a naturally short-lived vertebrate species, the  
435 African turquoise killifish. To our knowledge, this dataset is the largest ‘omic’ dataset  
436 evaluating vertebrate ovarian and testicular aging and will represent a unique resource for  
437 reproductive aging research. To note, we performed this study using only fish from the  
438 inbred GRZ laboratory strain, a single genetic background of African turquoise killifish,  
439 continuously inbred since originally established in 1973. Thus, it is possible that other strains  
440 of this species may show different gonadal aging trajectories. For instance, other laboratory  
441 strains (*e.g.* MZM-0703, MZM-0410) are longer lived than the GRZ strain (Kim et al. 2016),  
442 and could thus exhibit differences in their reproductive aging patterns. Further, laboratory  
443 strains represent only a fraction of the genetic diversity available in the wild for this species.  
444 Indeed, GRZ and wild-derived turquoise killifish reared under the same laboratory conditions  
445 experience different fecundity and fertility rates during aging (Zak and Reichard 2021),  
446 although the same overall reproductive aging trends (albeit at different timescales) were  
447 observed across populations. Finally, African turquoise killifish may not experience  
448 significant age-related decline in reproductive function over their short lifespan in the wild,  
449 although a decline in relative fecundity (*i.e.* egg generation controlled for total body mass)  
450 has been reported in wild females (Vrtilek et al. 2018a). Thus, we note that future studies  
451 incorporating more genetically diverse strains (and in their natural habitat) may reveal  
452 variation in the patterns of molecular regulation of reproductive aging in this species.

453         With our inclusion of a middle-aged time point, in addition to young adult and old  
454 ages, this dataset enables the discovery of dynamic and non-linear patterns of regulation,  
455 thus helping understand gonadal aging trajectories in addition to just the endpoint of gonadal  
456 aging. Indeed, we found that many key events, including those relating to TE transcriptional  
457 regulation and piRNA pathway regulation, are most salient at middle-age in ovaries, rather

458 than undergoing linear changes with age. Our observations differ from reports in *Drosophila*  
459 egg chambers, in which PIWI-related genes were upregulated during aging though global TE  
460 expression levels remained largely stable (Erwin and Blumenstiel 2019). Importantly, our  
461 observations that the aging ovarian transcriptome is more impacted than the testicular  
462 transcriptome are consistent with previous microarray studies of mouse gonadal aging  
463 (Sharov et al. 2008). To note, in long-lived species (e.g. humans), male germ cells can  
464 accumulate mutations from repeated divisions during aging, which can impact offspring  
465 fitness and disease risk – the “father’s age effect” (Kong et al. 2012). Due to the relatively  
466 short lifespan of vertebrate models used in aging research (i.e. African turquoise killifish,  
467 mouse), it is unlikely that the impact of repeated male germ cell divisions over male lifespan  
468 can be appropriately modeled in these species, thus potentially explaining the relative  
469 paucity of changes observed in the molecular landscapes of aging testes.

470

#### 471 *A unique crosstalk between piRNA biogenesis and TE activity in the aging vertebrate gonad*

472 We characterized TE expression and PIWI pathway behavior throughout life in  
473 turquoise killifish ovaries and testes. Importantly, we found that the PIWI pathway controls  
474 TE expression in the gonads throughout the turquoise killifish lifespan. Age-related fertility  
475 decline is common across many metazoans (Jones et al. 2014). The turquoise killifish is no  
476 exception to this rule, with fertility generally declining after middle-age, especially in females  
477 (Zak and Reichard 2021). For both sexes, fertility peaks around the middle-age timepoint  
478 used in this study (Zak and Reichard 2021). Interestingly, this timepoint coincided with the  
479 largest changes in TE- and piRNA related events in both sexes, albeit much more  
480 pronounced in ovaries compared to testes. This may correspond to a period of increasing  
481 gametogenesis in which epigenetic modifications are globally removed from germ cells prior  
482 to repatterning. Such epigenetic erasure would provide a means of “escape” for TEs in the  
483 form of transcription. Since the females are asynchronous spawners and continuously  
484 produce oocytes, we might expect that, like in males, TE transcription may reflect gamete  
485 production output. To note, our observations may capture differential amplitudes of

486 reproductive aging between the sexes - with more dramatic increases in TE transcription in  
487 ovaries, which undergo a clearly measurable reproductive senescence, compared to more  
488 modest changes in testes, which are thought to undergo near negligible reproductive  
489 senescence (Vrtilek et al. 2018a; Zak and Reichard 2021).

490 Overall, even in this short-lived species, the PIWI pathway seems to broadly keep  
491 gonadal TE transcription stable at the global transcriptomic level (**Fig. 4B**), although there is  
492 clear regulatory variation depending on specific TE sequences. This relatively controlled  
493 transcriptional output for TE loci seems to contrast with reports of global transcriptional  
494 derepression of TE sequences in aging somatic tissues (De Cecco et al. 2013; Bravo et al.  
495 2020). When expressed, TEs can cause DNA damage and/or initiate innate immune  
496 responses due to their intrinsic similarity to viruses (Simon et al. 2019). This contrast  
497 between TE activity in germline/somatic tissues is especially interesting considering that  
498 non-aging taxa (e.g. *Hydra*, *Planaria*) can express PIWI in somatic stem cells (Schaible et al.  
499 2015; Sahu et al. 2017; Teefy et al. 2020). This suggests that looser TE control may drive  
500 aspects of aging, especially in the soma, whereas tighter TE control is crucial to allow the  
501 emergence of non-aging states, such as those found in the germline.

502

### 503 *Dynamic TE control in the aging African turquoise killifish ovary*

504 If piRNA metabolism dynamics in the turquoise killifish ovary are similar to those of  
505 zebrafish (with *PIWIL1* expression being largely confined to immature germ cells) (Liu et al.  
506 2022), then downregulation of PIWI-related genes in bulk middle-age ovaries could merely  
507 reflect a lower underlying proportion of immature oocytes. However, our histological and  
508 deconvolution analyses suggest that large scale changes in oocytes maturation are unlikely  
509 to underlie observed changes in PIWI pathway activity during ovarian aging (**Supplemental**  
510 **Fig. S4**).

511 Alternatively, increased TE expression in middle-aged ovaries (and thus decreased  
512 TE control) may be a symptom of decreased oocyte quality before fertility starts to decline,  
513 suggesting that reproductive aging may precede organismal decline. Specifically, decreased

514 TE transcription and increased expression of PIWI pathway components in old ovaries may  
515 constitute a delayed response to increased TE transcription and decreased expression of  
516 PIWI pathway components at middle-age.

517         Finally, it is possible that such a transient relaxation of TE control in middle-age  
518 ovaries for the turquoise killifish may have adaptative value. Indeed, parental age in the  
519 turquoise killifish has been proposed to convey environmental information for evolutionary  
520 benefit. Embryos of old breeders enter are more likely to state of suspended animation  
521 known as diapause, which killifish utilize to persist under dry conditions between rainy  
522 seasons, than the embryos of young breeders (Api et al. 2018). Within a single wet season,  
523 the offspring of older mothers are more likely to immediately encounter a dry season, while  
524 those of younger mothers are more likely to propagate and yield multiple generations (Api et  
525 al. 2018).

526         Likewise, allowing some level of age-associated TE mobilization in the germline  
527 through tunable activity of the PIWI pathway could help ensure adequate levels of genetic  
528 diversity in a species with naturally small populations due to its unique ecology. Consistently,  
529 annual killifish, like *Nothobranchius furzeri*, have much higher genomic TE content than non-  
530 annual killifish species that do not experience such extreme population bottlenecks from  
531 seasonal aquatic habitat desiccation (Cui et al. 2020). TEs have long been appreciated in  
532 plant biology for their contribution to genetic diversity and are now appreciated sources of  
533 genetic diversity and drivers of speciation in animals (McClintock 1984; Gonzalez et al.  
534 2010; Akagi et al. 2013; Belyayev 2014; Bariah et al. 2020; Chen et al. 2020; Catlin and  
535 Josephs 2022). In line with the hypothesis that relaxed germline TE restriction may enhance  
536 population-level genetic diversity is our observation that ping-pong rate in killifish ovaries  
537 decreases steadily with age. This age-related PIWI behavior could support a population  
538 facing severe bottlenecks by first generating many healthier (but less genetically diverse)  
539 progeny during young adulthood. Subsequently, with females still breeding at a more  
540 advanced age, reduced PIWI pathway activity could help generate a more genetically

541 diverse pool of progeny that could improve genetic diversity for the long-term adaptability of  
542 the local population.

543

544 In summary, our data supports the notion that even a short-lived species such as the  
545 African turquoise killifish can maintain adequate TE silencing in germline-containing tissues  
546 throughout life, likely due to the activity of the PIWI pathway. The impact of fluctuations in TE  
547 transcription and PIWI pathway activity, especially in ovarian tissues, remains an open  
548 question. Understanding disruptions to gonadal genomic regulatory networks during aging  
549 will be crucial to define strategies to preserve or prolong reproductive fitness with aging.

550 **Material and methods**

551 *African turquoise killifish husbandry*

552 African turquoise killifish were raised according to gold standard procedures  
553 (Dodzian et al. 2018). To decrease risks of aggression, adult fish were single housed in 2.8L  
554 tanks on a recirculating aquatics system manufactured by Aquaneering Inc. System water  
555 parameters were as follows: temperature: 29°C; pH: 7.3; conductance: 670-750  $\mu$ S;  
556 ammonia and nitrite: 0ppm and Nitrate: ~15 ppm. Adult fish were fed twice per day with  
557 Hikari Freeze Dried Bloodworms 4-6 hours apart, and live *Artemia* once per day. Fry were  
558 reared in system water incubated at 28°C, then placed on the recirculating system starting at  
559 2 weeks post hatch. Fry were fed live *Artemia* exclusively until 4 weeks post hatch. The fish  
560 facility was kept on a light/dark cycle of 13/11 hours (lights on 9am-10pm). The fish were  
561 euthanized by immersion in 1.5 g/L of Tricaine MS-222 dissolved in system water followed  
562 by decapitation. All fish were euthanized between 2 and 4 pm to minimize circadian effects.  
563 All husbandry conditions and experimental procedures were approved by the University of  
564 Southern California (USC) IACUC. Animal care and animal experimentation were performed  
565 in accordance with IACUC approved protocols for *Nothobranchius furzeri* at the University of  
566 Southern California (approved protocols 20879 and 21023).

567

568 *Lifespan data collection*

569 Lifespan data was derived from historical data in our colony collected 2019-2022.  
570 Time from hatching to humane endpoint/euthanasia or natural death was recorded as killifish  
571 lifespan. All lifespan data reported here is derived from single-housed fish to limit death or  
572 injuries linked with frequent fighting in this species.

573

574 *RNA extraction and sequencing*

575 Ovaries and testes were dissected from 5-week-old, 10-week-old, and 15-week-old  
576 turquoise killifish (N = 5 per group) and flash-frozen on dry ice. Our chosen number of  
577 biological replicates for each group is in the range shown to be robust for differential gene

578 expression analysis by RNA-seq (Lamarre et al. 2018). Importantly, we defined the 3 age  
579 groups based on generally accepted guidelines in the field of aging research: (i) the chosen  
580 “young” adult time point at 5 weeks represents sexual maturity (*i.e.* the age at which  
581 individuals are able to reproduce), to avoid measuring developmental signals, (ii) the chosen  
582 “old” time point at 15 weeks represents ~90% population survival in our GRZ colony  
583 regardless of sex (**Fig. 1B**), allowing sample of aged animals before any risk of survivorship  
584 bias (Flurkey et al. 2007), and (iii) the chosen “middle-aged” time point at 10 weeks is the  
585 midpoint between these extremes. Total RNA was extracted from flash-frozen gonads by  
586 homogenizing using Trizol (Thermo Fisher, 15596018) and Lysing Matrix D tubes (MP  
587 Biomedicals, 11422420) on a BeadBug 6 microtube homogenizer (Millipore Sigma,  
588 Z742683) for 2 rounds of 30 seconds at 3500 rpms. RNA was assayed for quality at the USC  
589 Genome Core using the Agilent Bioanalyzer total RNA assay, and only high-quality RNA  
590 samples (RIN > 7) were selected for further processing to avoid RNA degradation related  
591 biases. Due to poor RNA quality, samples for three males (one from each age group) and  
592 one 15-week female were eliminated at this stage. RNA samples were sent to Novogene  
593 Corporation (USA) for library construction and sequencing, where mRNA and small RNA  
594 sequencing libraries were generated from the same total RNA samples in parallel. mRNA  
595 libraries were prepared by enrichment with oligo(dT) beads and sequenced on an Illumina  
596 NovaSeq 6000 generating 150 bp paired-end libraries. Small RNA seq libraries were  
597 generated by 3’ adapter ligation, 5’ adapter ligation, reverse transcription, PCR amplification,  
598 and gel purification and size selection. Small RNA samples were sequenced on an Illumina  
599 Novaseq 6000 generating 50 nucleotide single-end read libraries. Raw sequencing data has  
600 been deposited to SRA under PRJNA854614.

601

#### 602 *mRNA-seq data pre-processing and genomic alignment*

603 FASTQ reads from mRNA libraries were first hard-trimmed using fastx\_trimmer  
604 (fastx\_toolkit 0.0.13) (Gordon A. 2010), to remove 5’ adapter fragments and low quality  
605 bases at the 3’ end of the reads using parameters “-f 16”, “-l 100”, and “-Q33”. Next, Illumina



606 adapters were removed using TrimGalore 0.6.7 (cutadapt 3.3) (Felix Krueger 2021). To  
607 maximize our capture of relevant reads, we used the most contiguous genome reference  
608 currently available for the African turquoise killifish, Genbank accession GCA\_014300015.1,  
609 described in Williamsen *et al.*, 2020 (Willemsen et al. 2020), as well as its corresponding  
610 gene annotation file. Since analysis of repetitive sequences was desired, we performed soft-  
611 masking with Repeatmasker 4.1.2-p1 (Smit 2013-2015) and a turquoise killifish specific  
612 consensus TE library downloaded from FishTEDB (downloaded: February 5, 2021) (Shao et  
613 al. 2018). A TE-specific GTF file for downstream analysis was generated using a custom R  
614 script for compatibility with the TETranscripts counting program (Jin et al. 2015). RNA-seq  
615 reads were aligned to the soft-masked turquoise killifish genome using STAR 2.7.0e,  
616 allowing 200 multimappers to accommodate TE sequence alignment (Dobin et al. 2013; Jin  
617 et al. 2015). Gene and TE counts were generated using TETranscripts 2.2.1 with default  
618 settings using gene annotations from GenBank and the RepeatMasker derived custom TE-  
619 specific GTF file.

620

#### 621 *Differential gene and TE expression analysis*

622 The TETranscripts count matrices for genes and TEs were analyzed together in R  
623 4.1.2 using DESeq2 v1.34.0 (Love et al. 2014). To identify differentially expressed  
624 transcripts and their patterns with aging in ovaries and testes, we used likelihood ratio  
625 testing [LRT] separately for each sex with each age as its own group. Significant genes were  
626 defined as those with an adjusted p-value of  $< 1E-6$  with the DESeq2 LRT test. Genes and  
627 TEs were then analyzed separately. Once significantly differentially expressed genes and  
628 TEs were identified, clusters of differentially expressed genes and TEs were unbiasedly  
629 identified using the 'degPatterns' function from the 'DEGreport' v1.30.3 package (Pantano  
630 2022).

631

#### 632 *Fractional TE analysis*

633 To compare fractional TE expression in killifish gonads, the TE transcripts count  
634 matrices used for differential gene and TE expression analysis were imported into R. For  
635 each biological replicate, assigned counts were classified as genic or TE-derived and the  
636 fractional TE representation for each replicate library was calculated as TE read counts  
637 divided by total read counts. Fractional counts were grouped by age and sex and tested for  
638 significance by the non-parametric Wilcoxon rank sum test between groups within each sex.

639

#### 640 *Functional enrichment analysis*

641 Data was prepared for functional enrichment analysis by running blastp (ncbi-blast  
642 v2.13.0) with African turquoise killifish protein sequences from the (Willemsen, 2020)  
643 GCA\_014300015.1 genome version, against Ensembl release 104 human protein  
644 sequences. For each query killifish sequence, only top hits with E-value < 1e-3 were  
645 retained, and these human homologs were used for functional enrichment analyses. Gene  
646 ontology (GO) enrichment analysis was performed using 'GOstats' 2.60.0 with GO terms  
647 downloaded using 'biomaRt' 2.50.3 (Durinck et al. 2009) corresponding to Ensembl release  
648 104. GO analysis was performed using the "Biological Process", "Cellular Component", and  
649 "Molecular Function" categories with a significance threshold equal to a false discovery rate  
650 [FDR] < 5%. GO analysis was performed on each of the gene patterns identified in the LRT-  
651 based DGE analysis described above.

652

#### 653 *piRNA selection, annotation, and piRNA cluster analyses*

654 FASTQ reads from small RNA libraries were trimmed of their adapters while keeping  
655 a minimal length of at least 18 nucleotides using TrimGalore 0.6.7 (cutadapt 3.3) (Felix  
656 Krueger 2021) with the commands "--length 18", "-a  
657 GTTCAGAGTTCTACAGTCCGACGATC", and "-a GTTCAGAGTTCTACAGTCCGACGATC".  
658 piRNAs were selected by size-selecting sequences between 24-35 nucleotides in length  
659 from the trimmed small RNA libraries (Gong et al. 2018; Huang et al. 2019). piRNA length  
660 distributions (**Supplemental Fig. S6A**) were generated by combining piRNA length

661 histogram data by sex and plotting the resultant length distribution in R. piRNA nucleotide  
662 distribution for each sex was computed by converting piRNA reads to fasta format files and  
663 concatenating by sex. Position weight matrices were generated from these fasta files in R  
664 using the package 'Biostrings' 2.58.0 (**Fig. 5B**). Sequence logos were generated from  
665 position weight matrices using the R package 'ggseqlogo' 0.1.

666 To identify piRNA clusters, we used the Protrac 2.42 software suite (Rosenkranz and  
667 Zischler 2012). Briefly, piRNAs were collapsed to unique reads, while retaining count  
668 numbers using the functions TBr2\_collapse.pl and TBr2\_duster.pl. These reads were then  
669 mapped to the soft-masked reference genome described previously using the function  
670 sRNAmapper.pl and clusters were identified by a preponderance of piRNA mapping within a  
671 particular window using the function proTRAC\_2.4.3.pl. Clusters were identified for each  
672 biological replicate before being combined such that only unique piRNA clusters remained  
673 using the Protrac function merge.pl. To assess the TE composition of piRNA clusters relative  
674 to the genome, the intersectbed command (bedtools 2.27.1) was used to extract piRNA  
675 cluster fasta sequences from the genome (Quinlan and Hall 2010). Then, Repeatmasker  
676 4.1.2-p1 was run as above on the isolated piRNA cluster fasta sequences to obtain TE  
677 family information, which was then contrasted with the genome-wide data in R.

678

#### 679 *piRNA differential expression and Ping-Pong analysis*

680 piRNAs were mapped to the soft-masked genome reference using bowtie 1.2.3  
681 (Langmead et al. 2009) with three allowed mismatches since piRNAs are known to bind with  
682 imperfect base-pairing (Juliano et al. 2014; George et al. 2015; Zhang et al. 2015; Teefy et  
683 al. 2020) using the parameters "-v 3 -a --best --strata -S" before being converted to bam  
684 format files with samtools 1.10 (Danecek et al. 2021). piRNA counts were then assigned  
685 using 'featureCounts' from the Subread 2.0.2 package, using fractional count attribution for  
686 multimapping reads (Liao et al. 2014). For featureCounts based read counting, a custom  
687 GTF file consisting of genes, TEs, piRNA clusters, and rRNA repeats as features was used  
688 to account for piRNA mapping to all relevant features to minimize biases in piRNA counts.

689 The resultant count matrix was imported into R, and rRNA-mapping reads were discarded  
690 prior to normalization. Then piRNA counts that mapped to genes, TEs, and piRNA clusters  
691 were normalized together using DEseq2. LRT-based clustering and DGE analysis was then  
692 performed for piRNA counts that mapped to TE sequences as described above.

693 To measure ping-pong biogenesis, we only considered piRNAs mapping to  
694 consensus TE sequences, since they constitute the most biologically relevant target of  
695 gonadal piRNAs. To analyze ping-pong biogenesis at a global level, we used the PPMeter  
696 0.4 program (Jehn et al. 2018). Briefly, PPMeter reports the rate of 10 bp overlaps between  
697 piRNA reads, a proxy for ping-pong biogenesis, by generating pseudo-replicates through  
698 bootstrapping one million piRNA reads (100 bootstraps). Using this approach, piRNA libraries  
699 can be directly compared to each other by measuring the number of ping-pong events (*i.e.*  
700 10 bp overlaps) per one million piRNA reads. The resultant metric, ping-pong rate per million  
701 bootstrapped reads (ppr-mbr) was calculated for each bootstrap in each piRNA library.  
702 Bootstrap values were combined per biological replicate and the median value was taken.  
703 Median ppr-mbr values were then grouped by age and sex and tested for statistical  
704 difference by age group within each sex by the non-parametric Wilcoxon rank sum test.

705 For TE-specific level ping-pong measurement, we used custom scripts that  
706 calculated  $Z_{10}$  scores for each consensus TE sequence.  $Z_{10}$  scores, as defined in (Han et al.  
707 2015; Vandewege et al. 2022) is the difference of 10 bp overlap occurrences and the mean  
708 of all other overlap occurrences within a 20 bp window divided by the standard deviation of  
709 all other overlap occurrences. This is shown in the following equation:

710

$$Z_{10} = \frac{(10 \text{ bp overlaps}) - (\mu_{1:9,11:20 \text{ bp overlaps}})}{\sigma_{1:9,11:20 \text{ bp overlaps}}}$$

711

712 To generate  $Z_{10}$  scores, the distances between piRNA 5' ends that mapped to  
713 opposite strands of consensus TE sequences were tabulated into a histogram using a  
714 custom bash script. The resultant histograms were imported into R and processed in a

715 custom script that reported the  $Z_{10}$  score for each consensus TE sequence. For some TE  
716 sequences, coverage was incomplete such that we could not derive  $Z_{10}$ -score information;  
717 these sequences were discarded from consideration. To measure the changes in  $Z_{10}$  scores  
718 with age, TE  $Z_{10}$  scores were separated by sex and grouped by age. Group-level  $Z_{10}$  scores  
719 were tested for significant differences by 1-way ANOVA in R, and only TEs with an adjusted  
720 p-value <0.05 were considered significantly regulated with aging in either gonad type.  
721 Significant TEs were then classified into clusters using the 'degPatterns' function from  
722 'DEGreport' 1.30.3 package as described previously. For biological group-level analysis of  
723  $Z_{10}$  scores, median  $Z_{10}$  values over all detected TE sequences were taken for each biological  
724 replicate and plotted as a function of age and sex. Difference in  $Z_{10}$  scores per group were  
725 tested between age groups within sexes by a non-parametric Wilcoxon rank sum test.

726

#### 727 *Scripts and code availability*

728 All scripts used in this study are available as an archive accompanying this  
729 manuscript (Supplemental Code), and on the Benayoun laboratory Github  
730 ([https://github.com/BenayounLaboratory/Killifish\\_reproductive\\_aging\\_resource](https://github.com/BenayounLaboratory/Killifish_reproductive_aging_resource)). All R scripts  
731 were run using R version 4.1.2.

732

733

#### 734 **Data access**

735 All raw sequencing data generated in this study have been submitted to the NCBI  
736 BioProject database (<https://www.ncbi.nlm.nih.gov/bioproject/>) under accession number  
737 PRJNA854614.

738

739

740 **Competing interest statement**

741 The authors have no conflict of interest.

742

743 **Acknowledgments**

744 Some panels were made with BioRender.com. We thank Suchi Patel of the USC  
745 Genome Core for running RNA bioanalyzer assays. We thank Jomille Jerez, Isabel Ollerton,  
746 Rajyk Bhala and Katelyn Hsu for assistance with killifish husbandry. We thank Dr. Carolyn  
747 Phillips, Dr. Minhoo Kim, Dr. Itamar Harel, Justin Gilmore, Juan Bravo, Casandra McGill, and  
748 Rajyk Bhala for insights and feedback on our manuscript. We thank Drs. Ryo Sanabria and  
749 Gilberto Garcia for advice on histological image analysis using ImageJ. This work was  
750 supported by an NIA T32 AG052374 Postdoctoral Training Grant fellowship to B.B.T, NIA  
751 R21 AG063739, NIGMS R35 GM142395, a pilot grant from the NAVIGAGE Foundation, and  
752 a Hanson-Thorell Family award to B.A.B.

753 The authors acknowledge the Center for Advanced Research Computing (CARC) at  
754 the University of Southern California for providing computing resources that have contributed  
755 to the research results reported within this publication (<https://carc.usc.edu>). Ovarian  
756 histological analysis was performed by the Translational Pathology Core at the USC Norris  
757 Comprehensive Cancer Center (supported by NCI P30 CA014089).

758

759 **Author contributions**

760 B.B.T. and B.A.B. designed the study. B.B.T. and A.A. performed fish husbandry.  
761 A.A. dissected killifish gonadal tissues. B.B.T. performed RNA extraction of samples and  
762 computational analyses, with assistance from A.X., P.P.S. and B.A.B. B.B.T. and B.A.B.  
763 wrote the manuscript with input from all authors. K.H. captured microscope images of aging  
764 ovaries, B.B.T., A.X., K.H. and B.A.B. conducted ImageJ analysis of ovarian histology. All  
765 authors edited and commented on the manuscript.

766

767

768 **References**

- 769 Akagi K, Li J, Symer DE. 2013. How do mammalian transposons induce genetic variation? A  
770 conceptual framework: the age, structure, allele frequency, and genome context of  
771 transposable elements may define their wide-ranging biological impacts. *Bioessays*  
772 **35**: 397-407.
- 773 Alberts SC, Altmann J, Brockman DK, Cords M, Fedigan LM, Pusey A, Stoinski TS, Strier KB,  
774 Morris WF, Bronikowski AM. 2013. Reproductive aging patterns in primates reveal  
775 that humans are distinct. *Proc Natl Acad Sci U S A* **110**: 13440-13445.
- 776 Api M, Notarstefano V, Olivotto I, Cellerino A, Carnevali O. 2018. Breeders Age Affects  
777 Reproductive Success in *Nothobranchius furzeri*. *Zebrafish* **15**: 546-557.
- 778 Bariah I, Keidar-Friedman D, Kashkush K. 2020. Where the Wild Things Are: Transposable  
779 Elements as Drivers of Structural and Functional Variations in the Wheat Genome.  
780 *Front Plant Sci* **11**: 585515.
- 781 Baumgart M, Priebe S, Groth M, Hartmann N, Menzel U, Pandolfini L, Koch P, Felder M,  
782 Ristow M, Englert C et al. 2016. Longitudinal RNA-Seq Analysis of Vertebrate Aging  
783 Identifies Mitochondrial Complex I as a Small-Molecule-Sensitive Modifier of  
784 Lifespan. *Cell Syst* **2**: 122-132.
- 785 Belyayev A. 2014. Bursts of transposable elements as an evolutionary driving force. *J Evol*  
786 *Biol* **27**: 2573-2584.
- 787 Ben Maamar M, Nilsson EE, Skinner MK. 2021. Epigenetic transgenerational inheritance,  
788 gametogenesis and germline developmentdagger. *Biol Reprod* **105**: 570-592.
- 789 Benayoun BA, Pollina EA, Singh PP, Mahmoudi S, Harel I, Casey KM, Dulken BW, Kundaje A,  
790 Brunet A. 2019. Remodeling of epigenome and transcriptome landscapes with aging

791 in mice reveals widespread induction of inflammatory responses. *Genome Res* **29**:  
792 697-709.

793 Bertoldo MJ, Listijono DR, Ho WJ, Riepsamen AH, Goss DM, Richani D, Jin XL, Mahbub S,  
794 Campbell JM, Habibalahi A et al. 2020. NAD(+) Repletion Rescues Female Fertility  
795 during Reproductive Aging. *Cell Rep* **30**: 1670-1681 e1677.

796 Bravo JI, Nozownik S, Danthi PS, Benayoun BA. 2020. Transposable elements, circular RNAs  
797 and mitochondrial transcription in age-related genomic regulation. *Development*  
798 **147**.

799 Catlin NS, Josephs EB. 2022. The important contribution of transposable elements to  
800 phenotypic variation and evolution. *Curr Opin Plant Biol* **65**: 102140.

801 Chen H, Zheng X, Xiao D, Zheng Y. 2016. Age-associated de-repression of retrotransposons  
802 in the Drosophila fat body, its potential cause and consequence. *Aging Cell* **15**: 542-  
803 552.

804 Chen J, Lu L, Robb SMC, Collin M, Okumoto Y, Stajich JE, Wessler SR. 2020. Genomic  
805 diversity generated by a transposable element burst in a rice recombinant inbred  
806 population. *Proc Natl Acad Sci U S A* **117**: 26288-26297.

807 Chen P, Kotov AA, Godneeva BK, Bazylev SS, Olenina LV, Aravin AA. 2021. piRNA-mediated  
808 gene regulation and adaptation to sex-specific transposon expression in *D.*  
809 *melanogaster* male germline. *Genes Dev* **35**: 914-935.

810 Core HCB. 2021. DGE analysis using LRT in DESeq2. Vol 2022.

811 Cui R, Medeiros T, Willemsen D, Iasi LNM, Collier GE, Graef M, Reichard M, Valenzano DR.  
812 2020. Relaxed Selection Limits Lifespan by Increasing Mutation Load. *Cell* **180**: 1272-  
813 1279.



- 814 Czech B, Hannon GJ. 2016. One Loop to Rule Them All: The Ping-Pong Cycle and piRNA-  
815 Guided Silencing. *Trends Biochem Sci* **41**: 324-337.
- 816 Dabrowski R, Ripa R, Latza C, Annibal A, Antebi A. 2020. Optimization of mass spectrometry  
817 settings for steroidomic analysis in young and old killifish. *Anal Bioanal Chem* **412**:  
818 4089-4099.
- 819 Danecek P, Bonfield JK, Liddle J, Marshall J, Ohan V, Pollard MO, Whitwham A, Keane T,  
820 McCarthy SA, Davies RM et al. 2021. Twelve years of SAMtools and BCFtools.  
821 *Gigascience* **10**.
- 822 De Cecco M, Criscione SW, Peterson AL, Neretti N, Sedivy JM, Kreiling JA. 2013.  
823 Transposable elements become active and mobile in the genomes of aging  
824 mammalian somatic tissues. *Aging (Albany NY)* **5**: 867-883.
- 825 Dobin A, Davis CA, Schlesinger F, Drenkow J, Zaleski C, Jha S, Batut P, Chaisson M, Gingeras  
826 TR. 2013. STAR: ultrafast universal RNA-seq aligner. *Bioinformatics* **29**: 15-21.
- 827 Dodzian J, Kean S, Seidel J, Valenzano DR. 2018. A Protocol for Laboratory Housing of  
828 Turquoise Killifish (*Nothobranchius furzeri*). *J Vis Exp* doi:10.3791/57073.
- 829 Durinck S, Spellman PT, Birney E, Huber W. 2009. Mapping identifiers for the integration of  
830 genomic datasets with the R/Bioconductor package biomaRt. *Nat Protoc* **4**: 1184-  
831 1191.
- 832 Erwin AA, Blumenstiel JP. 2019. Aging in the Drosophila ovary: contrasting changes in the  
833 expression of the piRNA machinery and mitochondria but no global release of  
834 transposable elements. *BMC Genomics* **20**: 305.
- 835 Falcon S, Gentleman R. 2007. Using GOSTats to test gene lists for GO term association.  
836 *Bioinformatics* **23**: 257-258.

- 837 Felix Krueger FJ, Phil Ewels, Ebrahim Afyounian, & Benjamin Schuster-Boeckler. 2021.  
838 FelixKrueger/TrimGalore: v0.6.7 - DOI via Zenodo (0.6.7). Zenodo.  
839 <https://doi.org/10.5281/zenodo.5127899>. Accessed August 20, 2021.
- 840 Finch CE. 2014. The menopause and aging, a comparative perspective. *J Steroid Biochem*  
841 *Mol Biol* **142**: 132-141.
- 842 Flurkey K, Curren J, Harrison D. 2007. The Mouse in Aging Research. *The Mouse in*  
843 *Biomedical Research* **3**.
- 844 George P, Jensen S, Pogorelcnik R, Lee J, Xing Y, Brasslet E, Vaury C, Sharakhov IV. 2015.  
845 Increased production of piRNAs from euchromatic clusters and genes in *Anopheles*  
846 *gambiae* compared with *Drosophila melanogaster*. *Epigenetics Chromatin* **8**: 50.
- 847 Gong J, Zhang Q, Wang Q, Ma Y, Du J, Zhang Y, Zhao X. 2018. Identification and verification  
848 of potential piRNAs from domesticated yak testis. *Reproduction* **155**: 117-127.
- 849 Gonzalez J, Karasov TL, Messer PW, Petrov DA. 2010. Genome-wide patterns of adaptation  
850 to temperate environments associated with transposable elements in *Drosophila*.  
851 *PLoS Genet* **6**: e1000905.
- 852 Gordon A. HG. 2010. FASTX-Toolkit. *Unpublished*.
- 853 Gunes S, Hekim GN, Arslan MA, Asci R. 2016. Effects of aging on the male reproductive  
854 system. *J Assist Reprod Genet* **33**: 441-454.
- 855 Han BW, Wang W, Li C, Weng Z, Zamore PD. 2015. Noncoding RNA. piRNA-guided  
856 transposon cleavage initiates Zucchini-dependent, phased piRNA production. *Science*  
857 **348**: 817-821.
- 858 Harel I, Valenzano DR, Brunet A. 2016. Efficient genome engineering approaches for the  
859 short-lived African turquoise killifish. *Nat Protoc* **11**: 2010-2028.

- 860 Hoffman GE, Schadt EE. 2016. variancePartition: interpreting drivers of variation in complex  
861 gene expression studies. *BMC Bioinformatics* **17**: 483.
- 862 Hu CK, Brunet A. 2018. The African turquoise killifish: A research organism to study  
863 vertebrate aging and diapause. *Aging Cell* **17**: e12757.
- 864 Huang S, Ichikawa Y, Igarashi Y, Yoshitake K, Kinoshita S, Omori F, Maeyama K, Nagai K,  
865 Watabe S, Asakawa S. 2019. Piwi-interacting RNA (piRNA) expression patterns in  
866 pearl oyster (*Pinctada fucata*) somatic tissues. *Sci Rep* **9**: 247.
- 867 Jehn J, Gebert D, Pipilescu F, Stern S, Kiefer JST, Hewel C, Rosenkranz D. 2018. PIWI genes  
868 and piRNAs are ubiquitously expressed in mollusks and show patterns of lineage-  
869 specific adaptation. *Commun Biol* **1**: 137.
- 870 Jin Y, Tam OH, Paniagua E, Hammell M. 2015. TETranscripts: a package for including  
871 transposable elements in differential expression analysis of RNA-seq datasets.  
872 *Bioinformatics* **31**: 3593-3599.
- 873 Jones OR, Scheuerlein A, Salguero-Gomez R, Camarda CG, Schaible R, Casper BB, Dahlgren  
874 JP, Ehrlen J, Garcia MB, Menges ES et al. 2014. Diversity of ageing across the tree of  
875 life. *Nature* **505**: 169-173.
- 876 Juliano CE, Reich A, Liu N, Gotzfried J, Zhong M, Uman S, Reenan RA, Wessel GM, Steele RE,  
877 Lin H. 2014. PIWI proteins and PIWI-interacting RNAs function in Hydra somatic stem  
878 cells. *Proc Natl Acad Sci U S A* **111**: 337-342.
- 879 Kenny LC, Lavender T, McNamee R, O'Neill SM, Mills T, Khashan AS. 2013. Advanced  
880 maternal age and adverse pregnancy outcome: evidence from a large contemporary  
881 cohort. *PLoS One* **8**: e56583.
- 882 Ketting RF. 2011. The many faces of RNAi. *Dev Cell* **20**: 148-161.

- 883 Kim Y, Nam HG, Valenzano DR. 2016. The short-lived African turquoise killifish: an emerging  
884 experimental model for ageing. *Dis Model Mech* **9**: 115-129.
- 885 Kong A, Frigge ML, Masson G, Besenbacher S, Sulem P, Magnusson G, Gudjonsson SA,  
886 Sigurdsson A, Jonasdottir A, Jonasdottir A et al. 2012. Rate of de novo mutations and  
887 the importance of father's age to disease risk. *Nature* **488**: 471-475.
- 888 Lamarre S, Frasse P, Zouine M, Labourdette D, Sainderichin E, Hu G, Le Berre-Anton V,  
889 Bouzayen M, Maza E. 2018. Optimization of an RNA-Seq Differential Gene Expression  
890 Analysis Depending on Biological Replicate Number and Library Size. *Front Plant Sci*  
891 **9**: 108.
- 892 Langmead B, Trapnell C, Pop M, Salzberg SL. 2009. Ultrafast and memory-efficient alignment  
893 of short DNA sequences to the human genome. *Genome Biol* **10**: R25.
- 894 LaRocca TJ, Cavalier AN, Wahl D. 2020. Repetitive elements as a transcriptomic marker of  
895 aging: Evidence in multiple datasets and models. *Aging Cell* **19**: e13167.
- 896 Liao Y, Smyth GK, Shi W. 2014. featureCounts: an efficient general purpose program for  
897 assigning sequence reads to genomic features. *Bioinformatics* **30**: 923-930.
- 898 Lin KY, Wang WD, Lin CH, Rastegari E, Su YH, Chang YT, Liao YF, Chang YC, Pi H, Yu BY et al.  
899 2020. Piwi reduction in the aged niche eliminates germline stem cells via Toll-GSK3  
900 signaling. *Nat Commun* **11**: 3147.
- 901 Liu Y, Kassack ME, McFaul ME, Christensen LN, Siebert S, Wyatt SR, Kamei CN, Horst S,  
902 Arroyo N, Drummond IA et al. 2022. Single-cell transcriptome reveals insights into  
903 the development and function of the zebrafish ovary. *Elife* **11**.
- 904 Love MI, Huber W, Anders S. 2014. Moderated estimation of fold change and dispersion for  
905 RNA-seq data with DESeq2. *Genome Biol* **15**: 550.

- 906 Malki S, van der Heijden GW, O'Donnell KA, Martin SL, Bortvin A. 2014. A role for  
907 retrotransposon LINE-1 in fetal oocyte attrition in mice. *Dev Cell* **29**: 521-533.
- 908 Mani SR, Juliano CE. 2013. Untangling the web: the diverse functions of the PIWI/piRNA  
909 pathway. *Mol Reprod Dev* **80**: 632-664.
- 910 McClintock B. 1984. The significance of responses of the genome to challenge. *Science* **226**:  
911 792-801.
- 912 Mira A. 1998. Why is meiosis arrested? *J Theor Biol* **194**: 275-287.
- 913 Naumann B, Englert C. 2018. Dispersion/reaggregation in early development of annual  
914 killifishes: Phylogenetic distribution and evolutionary significance of a unique  
915 feature. *Dev Biol* **442**: 69-79.
- 916 Pantano L. 2022. DEGreport: Report of DEG analysis. R package version 1.30.3., Vol 2022, p.  
917 DEGreport: Report of DEG analysis. R package version 1.30.33.
- 918 Perheentupa A, Huhtaniemi I. 2009. Aging of the human ovary and testis. *Mol Cell*  
919 *Endocrinol* **299**: 2-13.
- 920 Quinlan AR, Hall IM. 2010. BEDTools: a flexible suite of utilities for comparing genomic  
921 features. *Bioinformatics* **26**: 841-842.
- 922 Reichwald K, Petzold A, Koch P, Downie BR, Hartmann N, Pietsch S, Baumgart M, Chalopin D,  
923 Felder M, Bens M et al. 2015. Insights into Sex Chromosome Evolution and Aging  
924 from the Genome of a Short-Lived Fish. *Cell* **163**: 1527-1538.
- 925 Roovers EF, Rosenkranz D, Mahdipour M, Han CT, He N, Chuva de Sousa Lopes SM, van der  
926 Westerlaken LA, Zischler H, Butter F, Roelen BA et al. 2015. Piwi proteins and piRNAs  
927 in mammalian oocytes and early embryos. *Cell Rep* **10**: 2069-2082.

- 928 Rosenberg AM, Rausser S, Ren J, Mosharov EV, Sturm G, Ogden RT, Patel P, Kumar Soni R,  
929 Lacefield C, Tobin DJ et al. 2021. Quantitative mapping of human hair greying and  
930 reversal in relation to life stress. *Elife* **10**.
- 931 Rosenkranz D, Zischler H. 2012. proTRAC--a software for probabilistic piRNA cluster  
932 detection, visualization and analysis. *BMC Bioinformatics* **13**: 5.
- 933 Sahu S, Dattani A, Aboobaker AA. 2017. Secrets from immortal worms: What can we learn  
934 about biological ageing from the planarian model system? *Semin Cell Dev Biol* **70**:  
935 108-121.
- 936 Sargent KM, McFee RM, Spuri Gomes R, Cupp AS. 2015. Vascular endothelial growth factor  
937 A: just one of multiple mechanisms for sex-specific vascular development within the  
938 testis? *J Endocrinol* **227**: R31-50.
- 939 Schaible R, Scheuerlein A, Danko MJ, Gampe J, Martinez DE, Vaupel JW. 2015. Constant  
940 mortality and fertility over age in Hydra. *Proc Natl Acad Sci U S A* **112**: 15701-15706.
- 941 Shao F, Wang J, Xu H, Peng Z. 2018. FishTEDB: a collective database of transposable  
942 elements identified in the complete genomes of fish. *Database (Oxford)* **2018**.
- 943 Sharov AA, Falco G, Piao Y, Poosala S, Becker KG, Zonderman AB, Longo DL, Schlessinger D,  
944 Ko M. 2008. Effects of aging and calorie restriction on the global gene expression  
945 profiles of mouse testis and ovary. *BMC Biol* **6**: 24.
- 946 Simon M, Van Meter M, Ablueva J, Ke Z, Gonzalez RS, Taguchi T, De Cecco M, Leonova KI,  
947 Kogan V, Helfand SL et al. 2019. LINE1 Derepression in Aged Wild-Type and SIRT6-  
948 Deficient Mice Drives Inflammation. *Cell Metab* **29**: 871-885 e875.
- 949 Smit A, Hubley, R & Green, P. . 2013-2015. RepeatMasker Open-4.0.  
950 <<http://www.repeatmasker.org>>. Accessed August 20, 2021.

- 951 Sousa-Victor P, Ayyaz A, Hayashi R, Qi Y, Madden DT, Lunyak VV, Jasper H. 2017. Piwi Is  
952 Required to Limit Exhaustion of Aging Somatic Stem Cells. *Cell Rep* **20**: 2527-2537.
- 953 Suzuki R, Shimodaira H. 2006. Pvclost: an R package for assessing the uncertainty in  
954 hierarchical clustering. *Bioinformatics* **22**: 1540-1542.
- 955 Teefy BB, Siebert S, Cazet JF, Lin H, Juliano CE. 2020. PIWI-piRNA pathway-mediated  
956 transposable element repression in Hydra somatic stem cells. *RNA* **26**: 550-563.
- 957 Terzibasi Tozzini E, Cellerino A. 2020. Nothobranchius annual killifishes. *Evodevo* **11**: 25.
- 958 Thomson T, Lin H. 2009. The biogenesis and function of PIWI proteins and piRNAs: progress  
959 and prospect. *Annu Rev Cell Dev Biol* **25**: 355-376.
- 960 Valenzano DR, Benayoun BA, Singh PP, Zhang E, Etter PD, Hu CK, Clement-Ziza M, Willemsen  
961 D, Cui R, Harel I et al. 2015. The African Turquoise Killifish Genome Provides Insights  
962 into Evolution and Genetic Architecture of Lifespan. *Cell* **163**: 1539-1554.
- 963 Valenzano DR, Sharp S, Brunet A. 2011. Transposon-Mediated Transgenesis in the Short-  
964 Lived African Killifish *Nothobranchius furzeri*, a Vertebrate Model for Aging. *G3*  
965 (*Bethesda*) **1**: 531-538.
- 966 Vandewege MW, Patt RN, 2nd, Merriman DK, Ray DA, Hoffmann FG. 2022. The PIWI/piRNA  
967 response is relaxed in a rodent that lacks mobilizing transposable elements. *RNA* **28**:  
968 609-621.
- 969 Vrtilek M, Zak J, Blazek R, Polacik M, Cellerino A, Reichard M. 2018a. Limited scope for  
970 reproductive senescence in wild populations of a short-lived fish.  
971 *Naturwissenschaften* **105**: 68.
- 972 Vrtilek M, Zak J, Psenicka M, Reichard M. 2018b. Extremely rapid maturation of a wild  
973 African annual fish. *Curr Biol* **28**: R822-R824.

- 974 Wang W, Han BW, Tipping C, Ge DT, Zhang Z, Weng Z, Zamore PD. 2015. Slicing and Binding  
975 by Ago3 or Aub Trigger Piwi-Bound piRNA Production by Distinct Mechanisms. *Mol*  
976 *Cell* **59**: 819-830.
- 977 Watanabe T, Totoki Y, Toyoda A, Kaneda M, Kuramochi-Miyagawa S, Obata Y, Chiba H,  
978 Kohara Y, Kono T, Nakano T et al. 2008. Endogenous siRNAs from naturally formed  
979 dsRNAs regulate transcripts in mouse oocytes. *Nature* **453**: 539-543.
- 980 Willemsen D, Cui R, Reichard M, Valenzano DR. 2020. Intra-species differences in population  
981 size shape life history and genome evolution. *Elife* **9**.
- 982 Yamashiro H, Siomi MC. 2018. PIWI-Interacting RNA in Drosophila: Biogenesis, Transposon  
983 Regulation, and Beyond. *Chem Rev* **118**: 4404-4421.
- 984 Yang N, Srivastav SP, Rahman R, Ma Q, Dayama G, Li S, Chinen M, Lei EP, Rosbash M, Lau  
985 NC. 2022. Transposable element landscapes in aging Drosophila. *PLoS Genet* **18**:  
986 e1010024.
- 987 Zak J, Reichard M. 2021. Reproductive senescence in a short-lived fish. *J Anim Ecol* **90**: 492-  
988 502.
- 989 Zhang P, Kang JY, Gou LT, Wang J, Xue Y, Skogerboe G, Dai P, Huang DW, Chen R, Fu XD et al.  
990 2015. MIWI and piRNA-mediated cleavage of messenger RNAs in mouse testes. *Cell*  
991 *Res* **25**: 193-207.
- 992
- 993
- 994



995 **Legends to Figures**

996 **Figure 1. A study of gonadal aging in the naturally short-lived African turquoise**  
997 **killifish**

998 **(A)** Experimental scheme for killifish gonad sequencing. Killifish gonads (N = 5) were  
999 dissected and total RNA was extracted. Only high quality RNA samples (RIN>7) were  
1000 included for further processing (see **Supplemental Fig. S1A**). Small RNA and mRNA RNA-  
1001 seq libraries were derived from each total RNA sample and sequenced for downstream  
1002 analyses. **(B)** Lifespan curve for female and male GRZ strain killifish at the USC Benayoun  
1003 lab facility. GRZ females lived significantly longer than males ( $p = 0.002$ ; log Rank test).  
1004 Median lifespan of females: 26.55 weeks, males: 19.4 weeks. Vertical dotted lines: ages  
1005 sampled in this study (5, 10, 15 weeks), chosen to represent aging before substantially  
1006 decreased population survival. **(C-E)** Principal component analyses [PCAs] for **(C)** mRNA  
1007 gene expression **(D)** TE expression and **(E)** TE-mapping piRNA abundance (see methods).

1008

1009 **Figure 2. Differential gene expression analysis and GO Biological Process functional**  
1010 **enrichment analysis with ovarian aging.**

1011 **(A)** Scheme used for differential gene expression [DGE] analysis used in this study. DGE  
1012 was performed with DESeq2's likelihood ratio testing [LRT], which revealed 4 approximate  
1013 groups of differentially expressed genes corresponding to expression (a) Down at Middle-  
1014 Age, (b) Up at Middle-Age, (c) Down with Age and (d) Up with Age. **(B)** Heatmaps of gene  
1015 expression for genes significantly regulated with age in aging killifish ovaries by DEseq2 LRT  
1016 ( $FDR < 1e-6$ ). Most differentially expressed genes transiently changed at middle-age. **(C)**  
1017 Functional enrichment analysis for each gene cluster in **Fig. 2B**, showing the top 10 most  
1018 significant GO "Biological Process" terms by 'GOstats' ( $FDR < 5\%$ ; see **Supplemental**  
1019 **Table S3A** for complete list of enriched terms). The most significant term downregulated in  
1020 middle-aged ovaries is "piRNA metabolic process" (bolded). FDR: False discovery rate.  
1021 Enrichment: fold enrichment over background.

1022

1023 **Figure 3. Differential gene expression and GO Biological Process functional**  
1024 **enrichment analysis with testicular aging.**

1025 **(A)** Heatmaps of gene expression for genes significantly regulated with age in aging killifish  
1026 testes by DEseq2 LRT (FDR < 1e-6). Groups correspond to those defined in **Fig. 2A**. Like  
1027 ovaries, most differential gene expression in killifish testes occurs transiently at middle-age.  
1028 **(B)** Functional enrichment analysis for each gene cluster shown in **Fig. 3A** showing the top  
1029 10 most significant GO "Biological Process" terms by 'GOSTats' (FDR < 5%; see  
1030 **Supplemental Table S3D** for complete list of enriched terms). Genes that are upregulated  
1031 in middle-age testis are enriched for terms related to spermatogenesis. Note that cluster (d)  
1032 (genes up with age) had too few genes to generate meaningful enrichment results. FDR:  
1033 False discovery rate. Enrichment: fold enrichment over background.

1034

1035 **Figure 4. TE expression dynamics in the aging turquoise killifish gonad.**

1036 **(A)** Experimental scheme for TE transcriptional analysis in aging gonads. Fractional TE  
1037 counts were computed by counting the number of TE counts over total assigned mRNA-seq  
1038 counts (genes and TEs). TE DGE was conducted in the same manner as the genic DGE  
1039 analysis (see methods), and were labelled with the cluster nomenclature from **Fig. 2A**. **(B)**  
1040 Proportion of assigned reads allocated to TEs from each mRNA-seq library for ovaries and  
1041 testes. Significance in non-parametric Wilcoxon Rank Sum test. Note that old ovaries have  
1042 significantly fewer proportional TE counts relative to middle-aged ovaries, and that testes  
1043 seem to show a marginal increase in TE transcription with aging. **(C)** Heatmaps of mRNA  
1044 expression for TEs significantly regulated with age in aging killifish ovaries by DEseq2 LRT  
1045 (FDR < 1e-6). Each TE family is color-coded by row, revealing no obvious bias or  
1046 enrichment for a specific TE type. **(D)** Heatmaps of mRNA expression for TEs significantly  
1047 regulated with age in aging killifish testes by DEseq2 LRT (FDR < 1e-6). The only age  
1048 differentially regulated TEs in the turquoise killifish testis are transiently upregulated at  
1049 middle-age.

1050

1051 **Figure 5. PIWI pathway activity and piRNA abundance characterization in aging**  
1052 **turquoise killifish gonads.**

1053 **(A)** Heatmaps of normalized gene expression from ovaries and testes with aging in the GO  
1054 "piRNA metabolic pathway" term. Killifish gene names and their best human homologs are  
1055 indicated for each row. Rows were normalized by the median expression level in the cognate  
1056 young gonad, so as to facilitate visualization of age-related changes. Genes involved in this  
1057 pathway tend to be significantly downregulated in middle-aged ovaries (see **Fig. 2C**). **(B)**  
1058 Sequence logo plots of piRNA nucleotide composition from ovaries and testes, using data  
1059 for each gonad type pooled across ages and replicates. As expected for piRNAs, killifish  
1060 piRNAs show a strong position 1-U bias. There is also a slight bias for Adenine at position  
1061 10, consistent with active ping-pong biogenesis in killifish gonads. **(C)** Stacked barplots  
1062 depicting the TE family composition of piRNA clusters and the killifish genome, as a  
1063 percentage of identified elements. The piRNA cluster TE composition is broadly reflective of  
1064 the TE composition of the genome. **(D)** Heatmaps of TE-targeted piRNA abundance for TEs  
1065 significantly regulated with age in aging killifish ovaries by DEseq2 LRT (FDR < 1e-6). TE  
1066 family is color-coded for each row. In ovaries, most differentially piRNA-targeted TEs show a  
1067 decrease of piRNA counts at middle-age. **(E)** Heatmaps of TE-targeted piRNA abundance  
1068 for TEs significantly regulated with age in aging killifish testes by DEseq2 LRT (FDR < 1e-6).  
1069 **(F)** Venn diagram of the overlap between TE\_mapping piRNAs significantly upregulated in  
1070 middle-age ovaries (see **Fig. 5D**; pattern a) and TEs that are significantly downregulated in  
1071 middle-age ovaries (see **Fig. 4C**; pattern b). Significance for the overlap being larger than  
1072 expected by chance was calculated using Fisher's exact test, compared to TEs detected in  
1073 both analyses. A pie chart of the composition of "consistent" TEs is also reported.

1074

1075 **Figure 6. Analysis of ping-pong biogenesis in aging turquoise killifish gonads.**

1076 **(A)** Explanatory diagram of ping-pong biogenesis. PIWI1 (the PIWI protein loaded with  
1077 'primary' piRNAs complementary to TEs) binds to and cleaves a TE mRNA species. The  
1078 cleaved TE mRNA is loaded into PIWI2 (the PIWI protein loaded with cleaved TE fragments,

1079 or 'TE-derived secondary' piRNAs). PIWI proteins always cleave their targets 10 basepairs  
1080 from the 5' end of the piRNA. This mechanism, known as ping-pong biogenesis, will  
1081 generate a preponderance of complementary piRNAs with a 10 basepair overlap, the  
1082 detection of which is the basis of the assays shown in **Fig. 6B-F**. **(B)** Boxplot showing the  
1083 median frequency of 10 basepair overlaps for 1 million piRNA reads over 100 bootstraps per  
1084 biological sample (ppr-mbr: Ping-Pong Reads per Million Bootstrapped Reads,) as  
1085 generated by PPMeter. Age groups within each sex were compared using the non-  
1086 parametric Wilcoxon rank sum test. **(C)** Boxplot showing median  $Z_{10}$  scores over consensus  
1087 TEs for each biological sample.  $Z_{10}$  scores are an alternative measure of ping-pong. Non-  
1088 parametric Wilcoxon Rank Sum tests were used to test for significant differences between  
1089 age groups. **(D)** Schematic for analysis of differential  $Z_{10}$  score patterns with gonadal aging.  
1090  $Z_{10}$  scores were generated for each consensus TE sequence in FishTEDB in each biological  
1091 sample. An ANOVA test was run to detect any significant differences in  $Z_{10}$  score between  
1092 age groups within each sex (FDR < 5%). Significant TEs were assigned to groups based on  
1093 expression dynamics that align to the broad groups defined in **Fig. 2A**, with the detection of  
1094 2 new subgroups showing minimal expression at middle-age ( $a_1$  and  $a_2$ ), with highest  $Z_{10}$   
1095 scores in the young samples and old samples, respectively. **(E)** Heatmaps of differential  $Z_{10}$   
1096 scores with age in aging killifish ovaries by ANOVA (FDR < 5%). **(F)** Heatmaps of differential  
1097  $Z_{10}$  scores with age in aging killifish testes by ANOVA (FDR < 5%). A roughly equivalent  
1098 amount of consensus TE sequences show linear up- and downregulation with age. The  
1099 cognate TE family is color-coded by row, and does not reveal any specific bias.

1100

1101

1102

**Figure 1****A Experimental Scheme**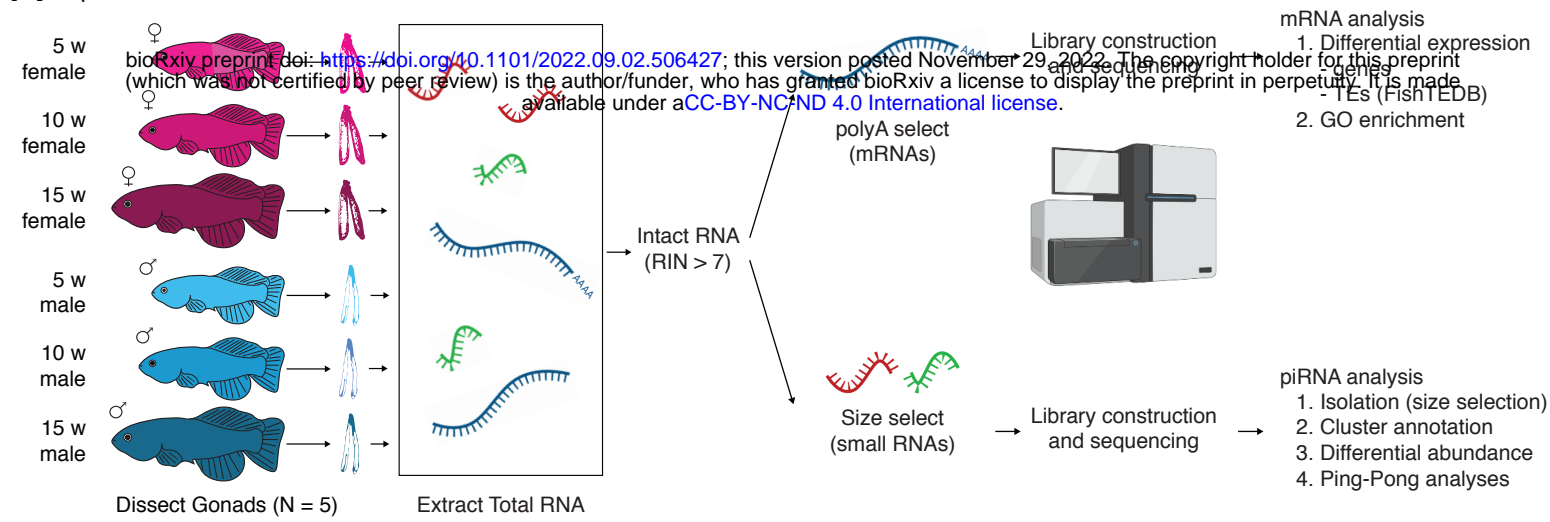**B Survival Analysis (African turquoise killifish, GRZ strain, USC)**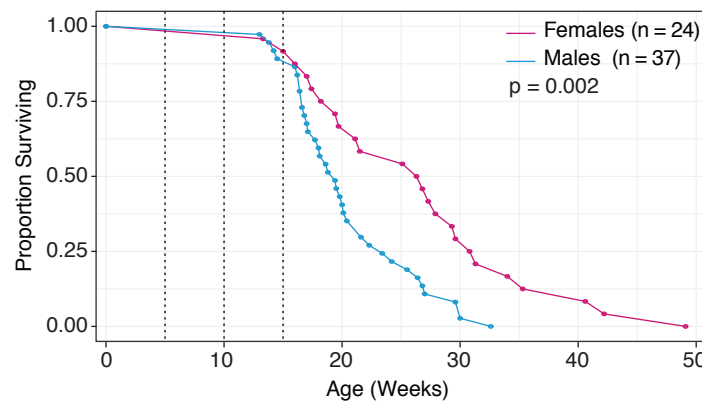**C mRNA Gene expression**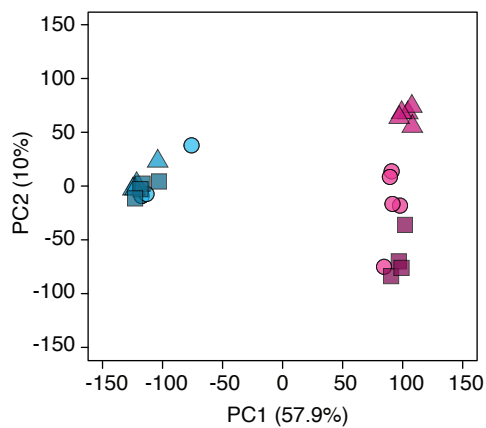**D mRNA TE expression**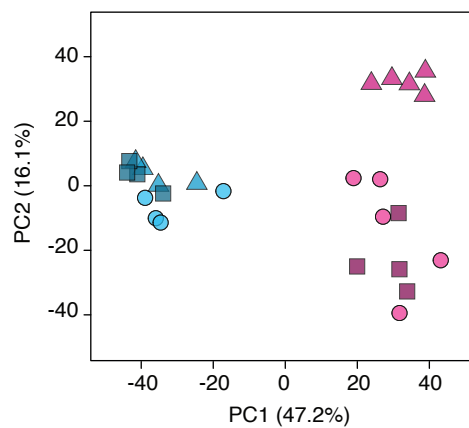**E piRNA abundances**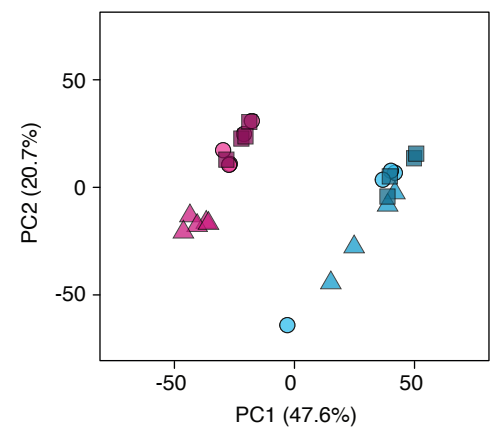

● 5 w ovaries    ▲ 10 w ovaries    ■ 15 w ovaries    ● 5 w testes    ▲ 10 w testes    ■ 15 w testes

## A Age-related differential gene expression pattern analytical scheme (DEseq2 LRT)

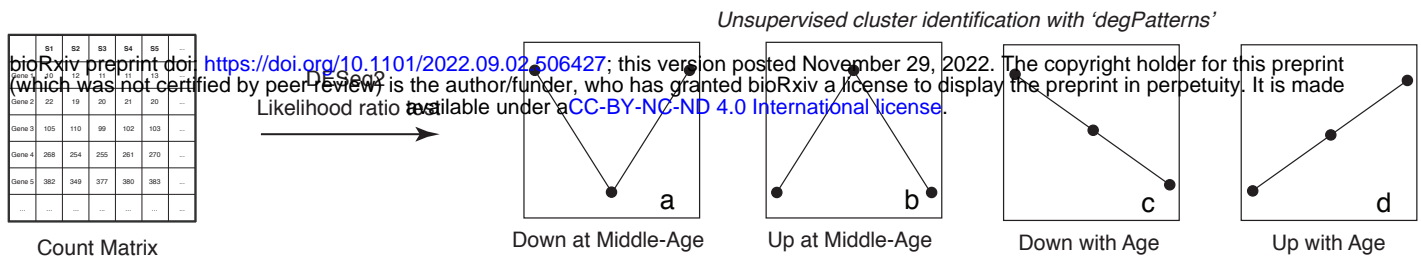

## B Heatmaps of ovarian age-regulated genes (FDR &lt; 1E-6)

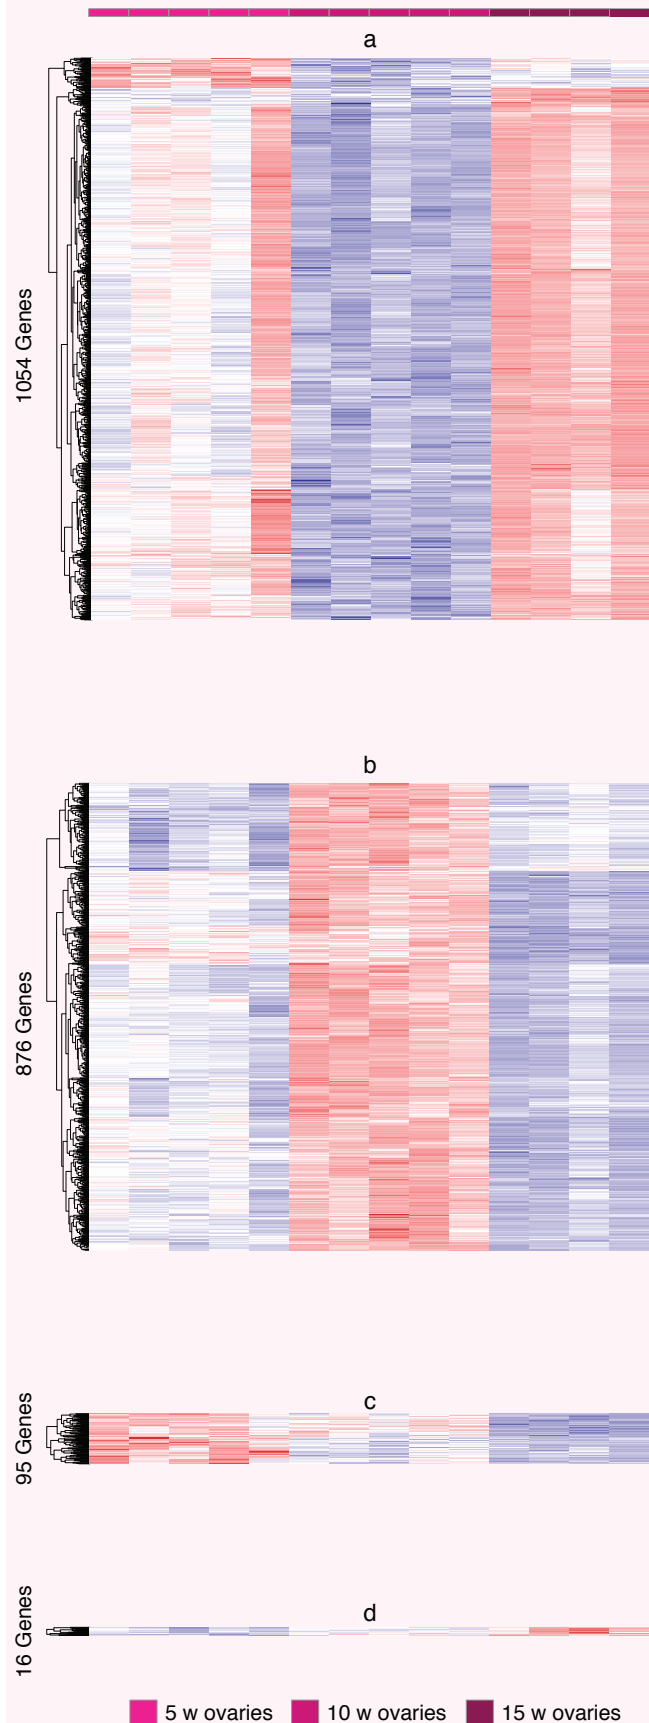

## C Top functional enrichment of ovarian age-regulated genes (GO BP)

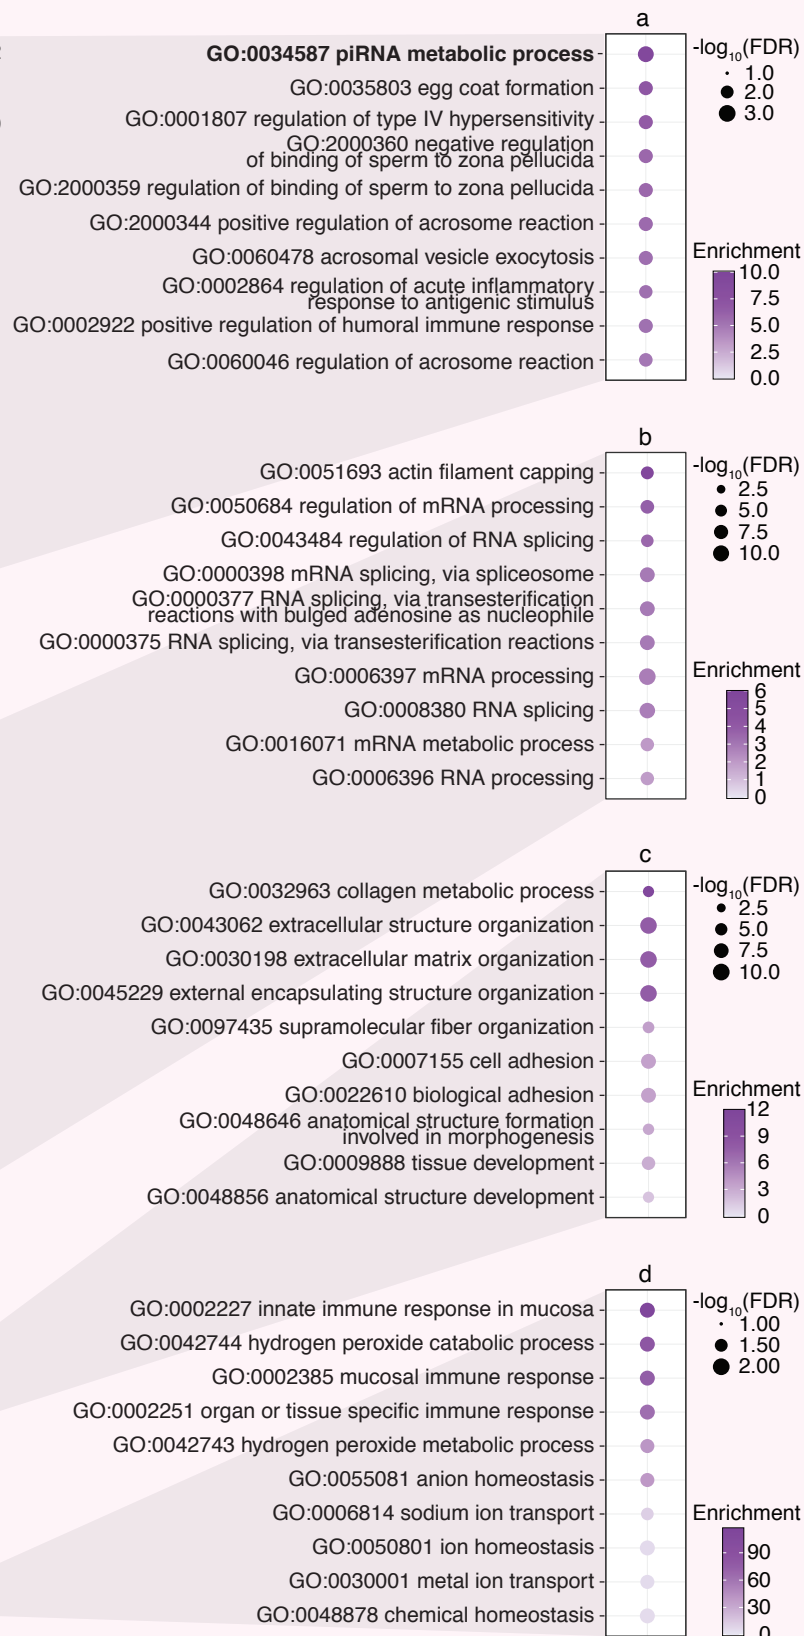

Figure 3

**A** Heatmaps of testicular age-regulated **genes** (FDR < 1E-6)

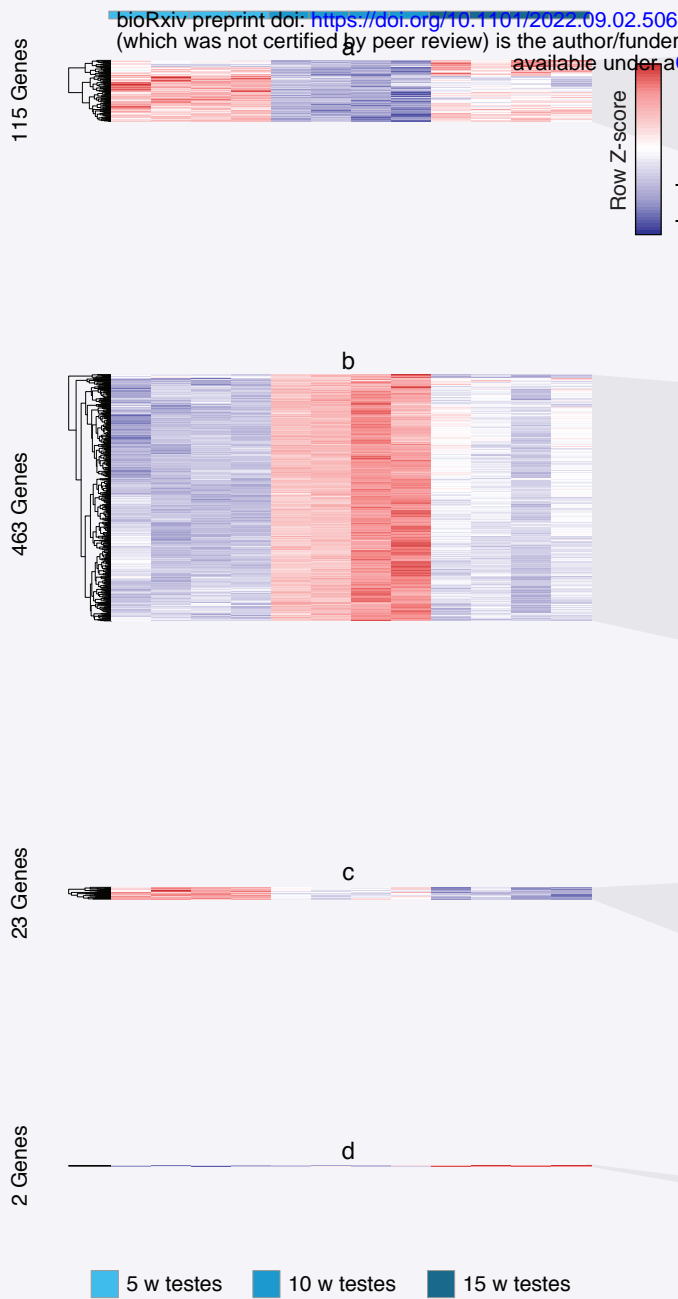

**B** Top functional enrichment of testicular age-regulated genes (GO BP)

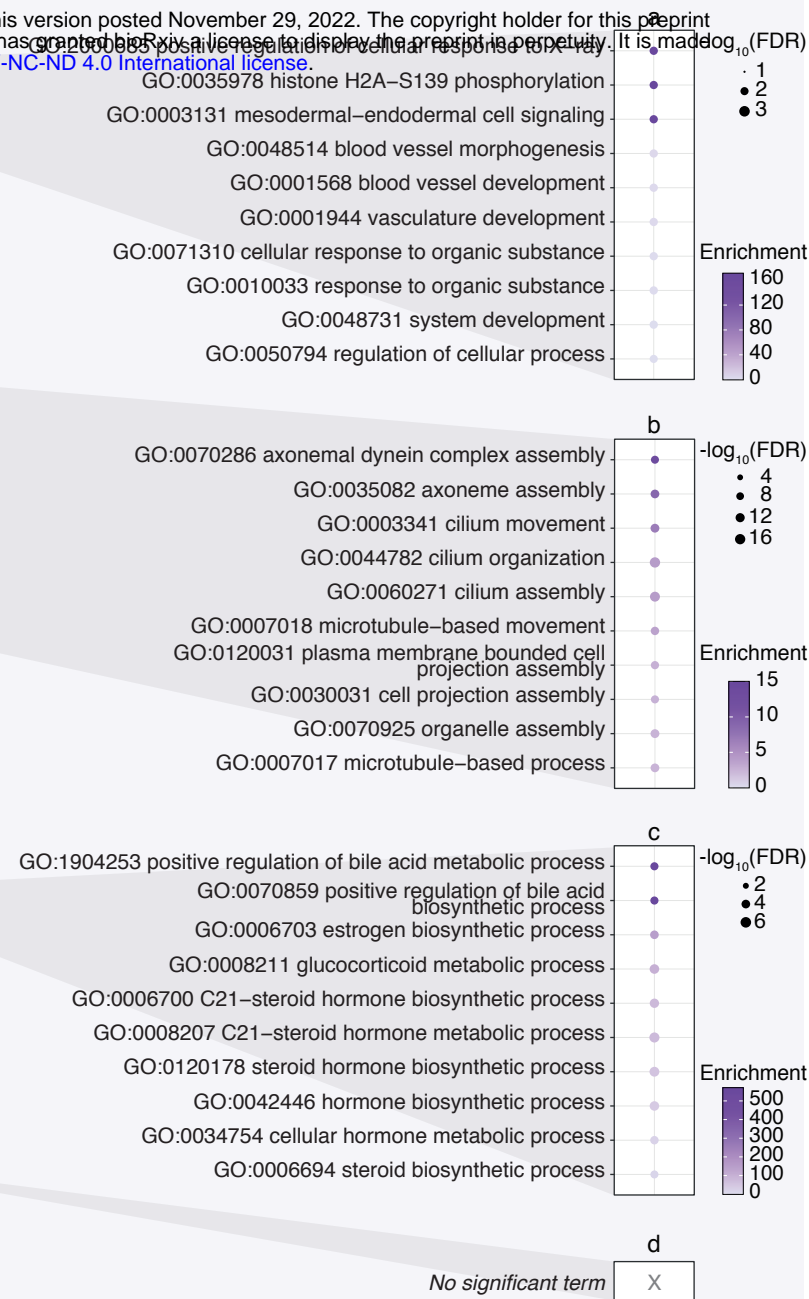

### A Scheme of gonadal TE expression analysis

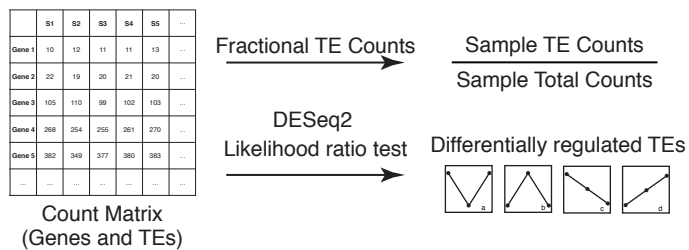

### B Fraction of mapped reads aligned to TE sequence in gonadal mRNA

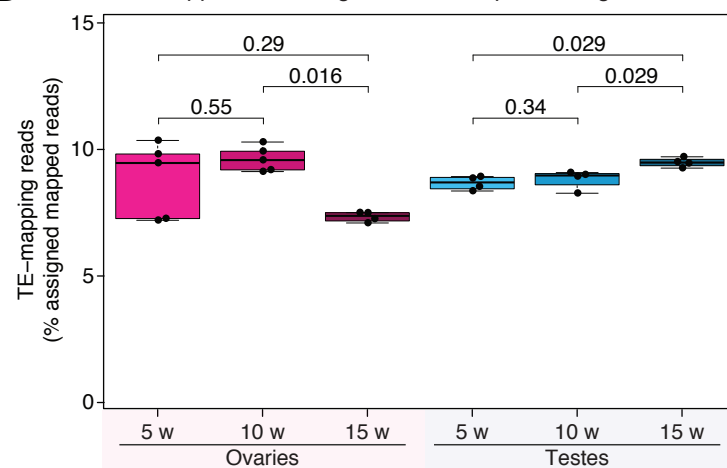

### C Heatmaps of ovary age-regulated TEs (FDR < 1E-6)

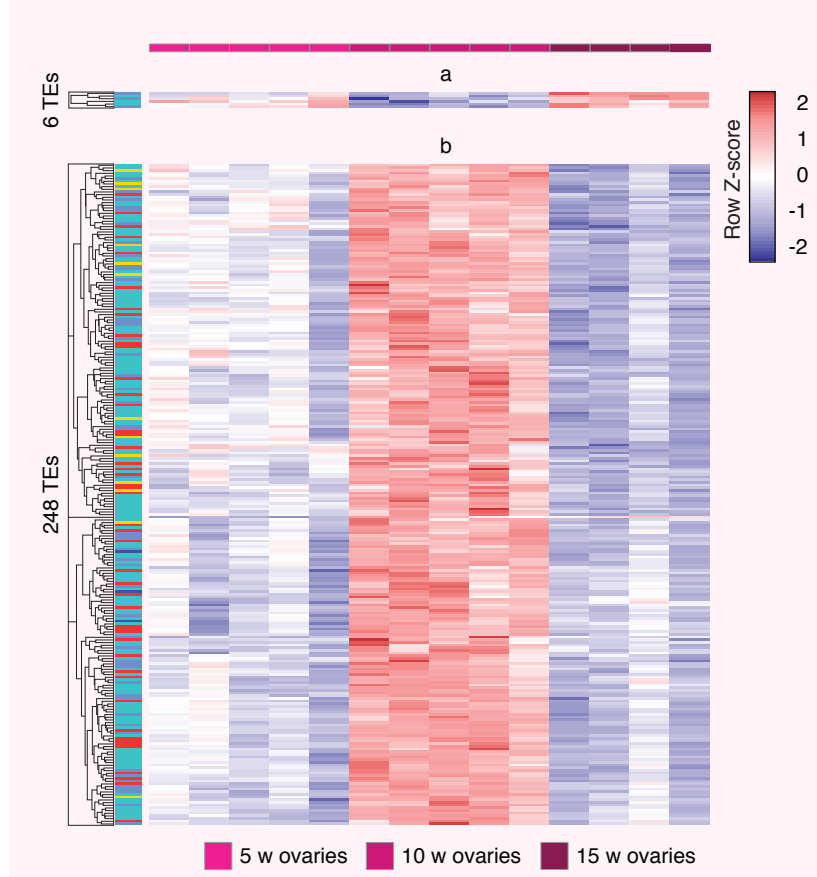

### D Heatmap of testes age-regulated TEs (FDR < 1E-6)

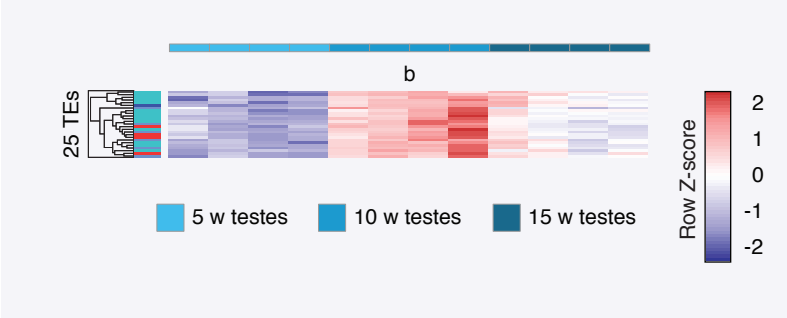

Consensus TE family

- DNA (red)
- LINE (teal)
- LTR (light blue)
- SINE (dark blue)
- Unknown (yellow)



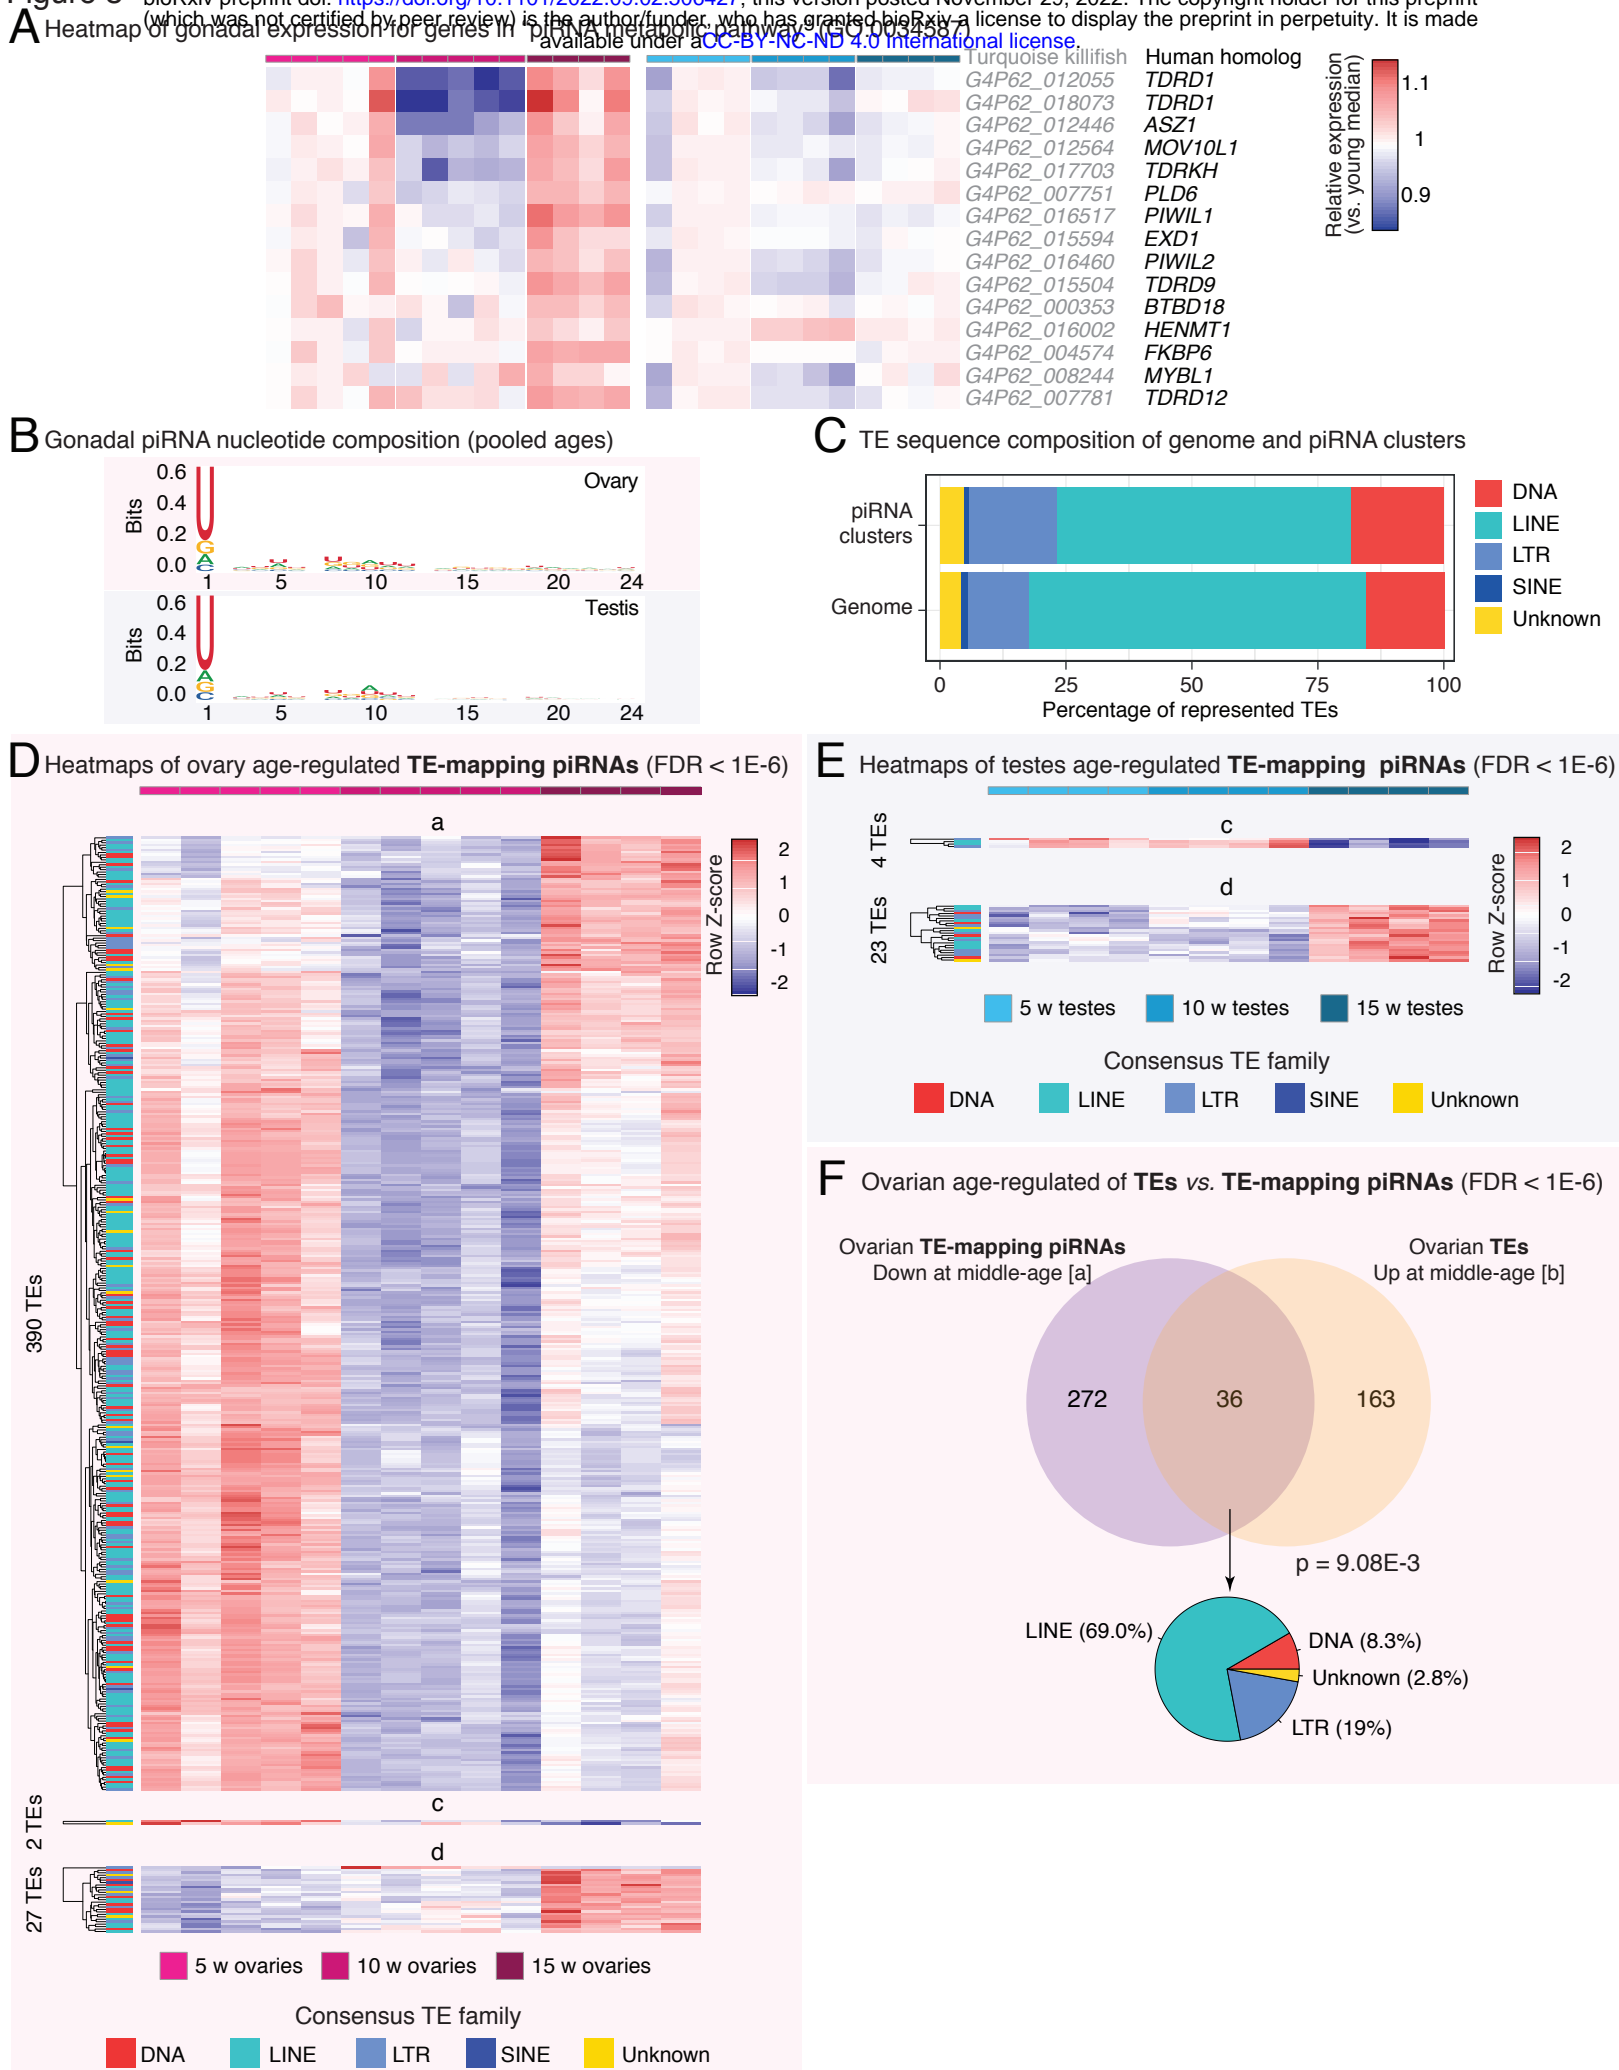

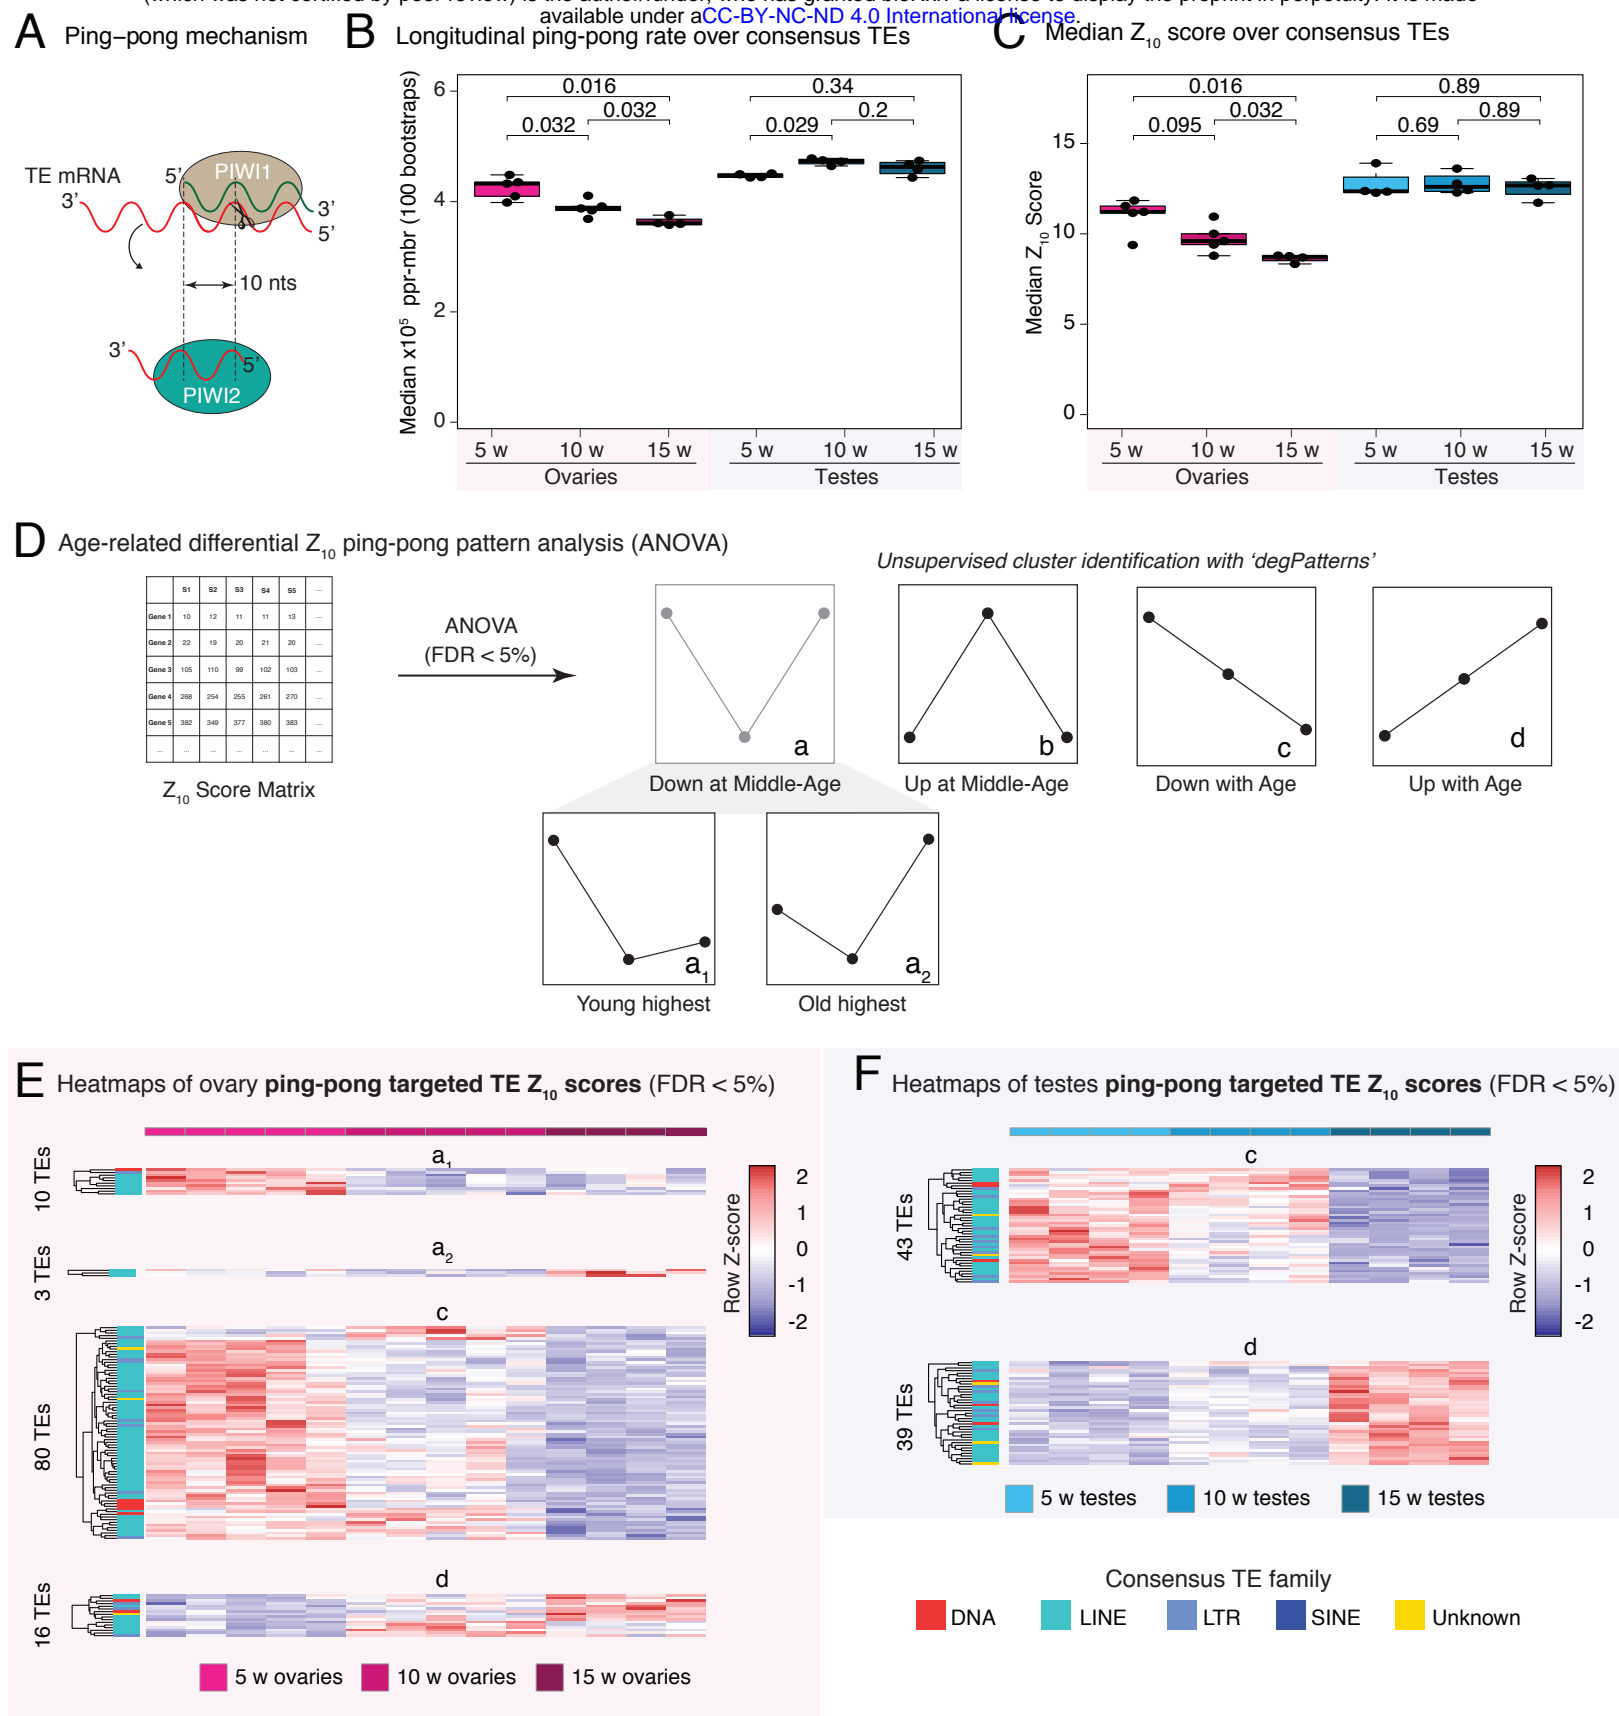

Source: https://www.biorxiv.org/content/10.1101/2022.09.02.506427v2.full.pdf
