# Supplementary material for: Dynamic regulation of gonadal transposon control across the lifespan of the naturally short-lived African turquoise killifish
Source: bioRxiv or medRxiv preprint supplement (doi:10.1101/2022.09.02.506427), 2022-11-29

Figure S1

A

| Datasets generated in this study | Ovaries    | Testes     | Total |
|----------------------------------|------------|------------|-------|
| mRNA-seq                         | 5,5,4 (14) | 4,4,4 (12) | 26    |
| small RNA-seq                    | 5,5,4 (14) | 4,4,4 (12) | 26    |

52 datasets

B Ovaries Gene Expression PCA

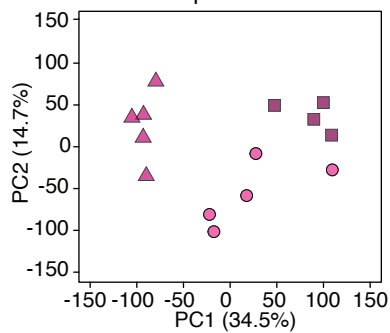

C Ovaries TE Expression PCA

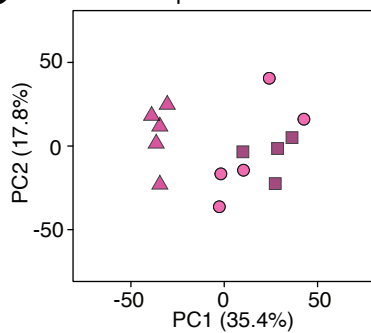

D Ovaries piRNA Expression PCA

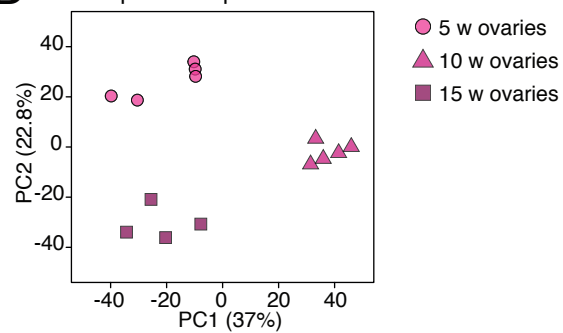

E Testes Gene Expression PCA

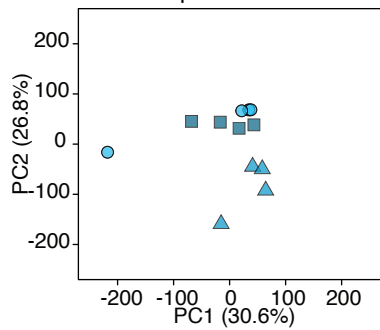

F Testes TE Expression PCA

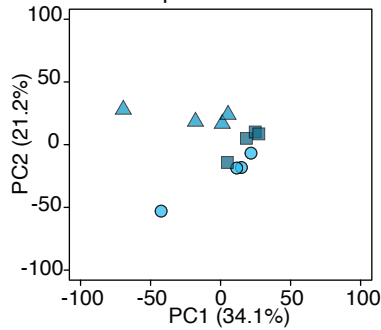

G Testes piRNA Expression PCA

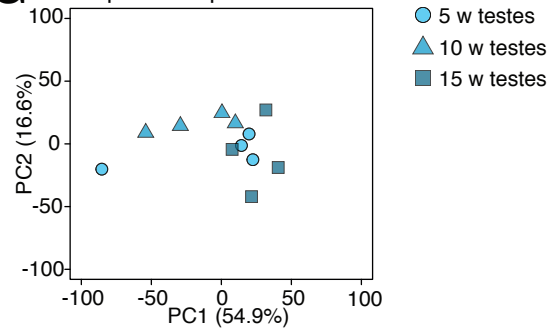

H Ovaries Gene Expression Clustering

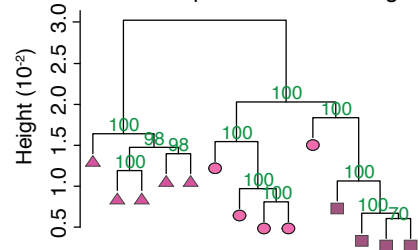

I Ovaries TE Expression Clustering

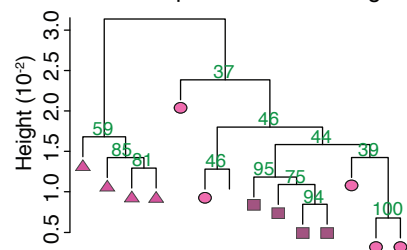

J Ovaries piRNA Expression Clustering

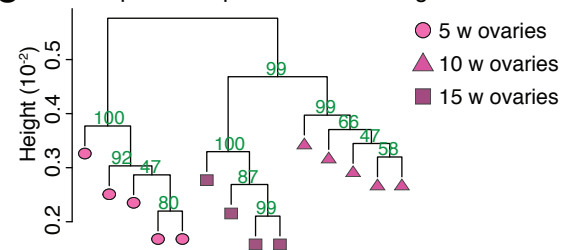

K Testes Gene Expression Clustering

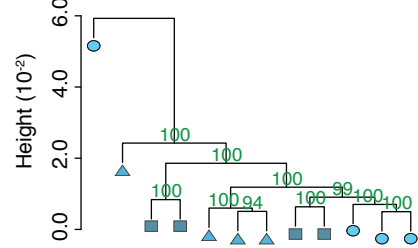

L Testes TE Expression Clustering

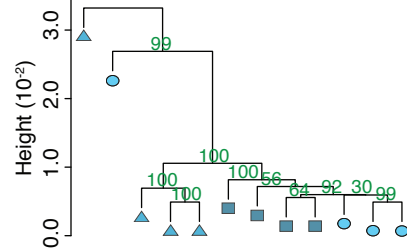

M Testes piRNA Expression Clustering

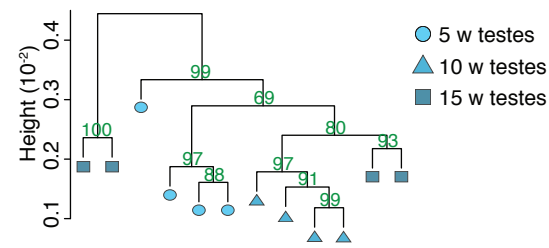

N Ovaries Gene Expression Variance Analysis

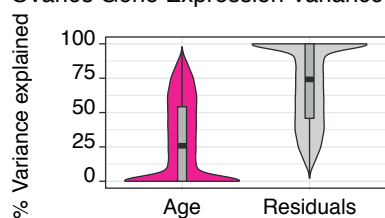

O Ovaries TE Expression Variance Analysis

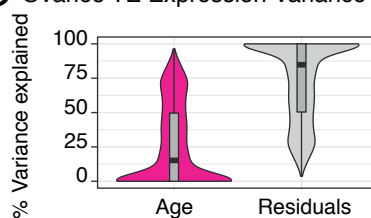

P Ovaries piRNA Expression Variance Analysis

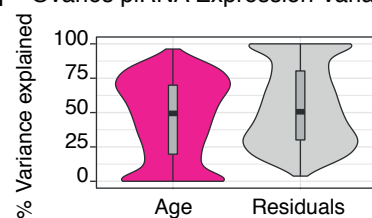

Q Testes Gene Expression Variance Analysis

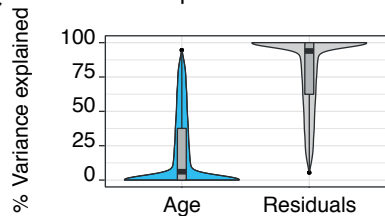

R Testes TE Expression Variance Analysis

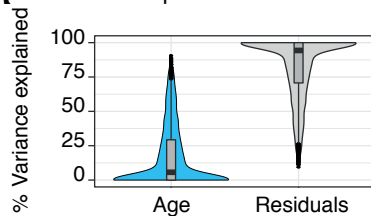

S Testes piRNA Expression Variance Analysis

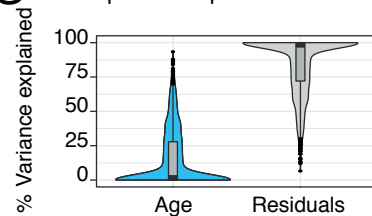

Supplement: Supplementary file [file media-3.pdf]
