# Supplementary material for: Dynamic regulation of gonadal transposon control across the lifespan of the naturally short-lived African turquoise killifish
Source: bioRxiv or medRxiv preprint supplement (doi:10.1101/2022.09.02.506427), 2022-11-29
Supplement: Supplementary file [file media-4.pdf]

Figure S2

**A** Boxplots of ovarian age-regulated genes (FDR < 1E-6)

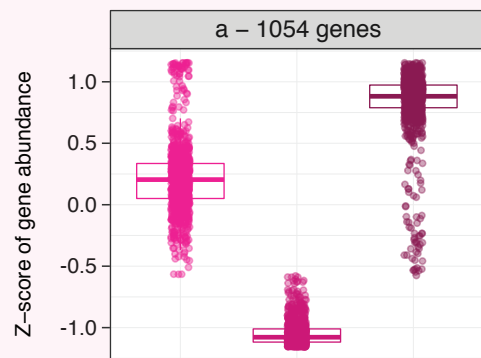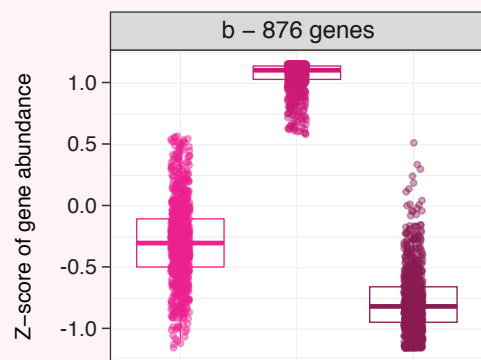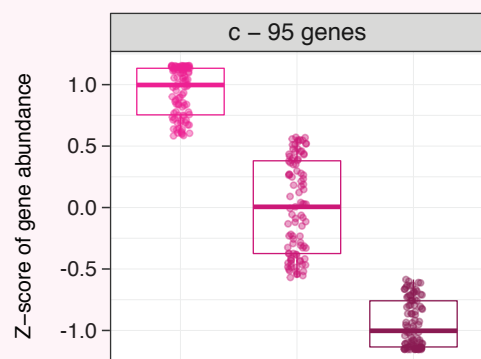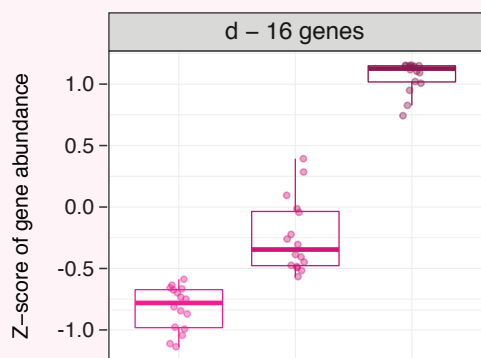

5 w ovaries 10 w ovaries 15 w ovaries

**B** Top functional enrichment of ovarian age-regulated genes (GO CC)

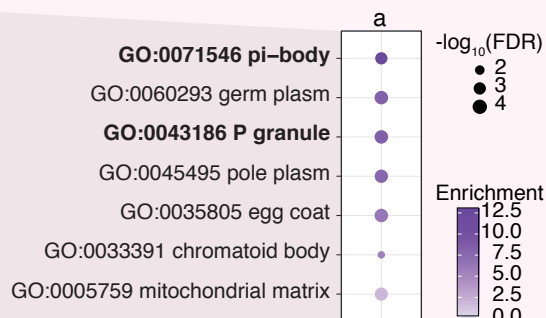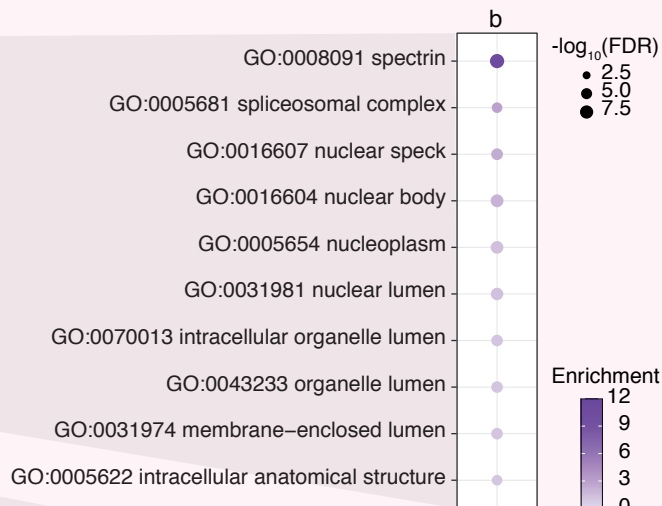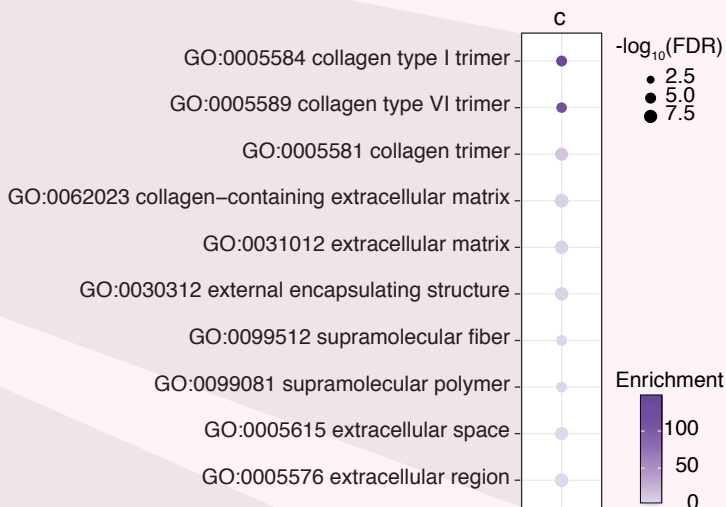

No significant term X
