# Supplementary material for: Dynamic regulation of gonadal transposon control across the lifespan of the naturally short-lived African turquoise killifish
Source: bioRxiv or medRxiv preprint supplement (doi:10.1101/2022.09.02.506427), 2022-11-29

Figure S3

**A** Boxplots of testes age-regulated genes (FDR < 1E-6)

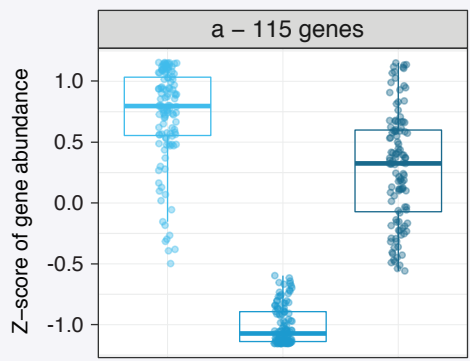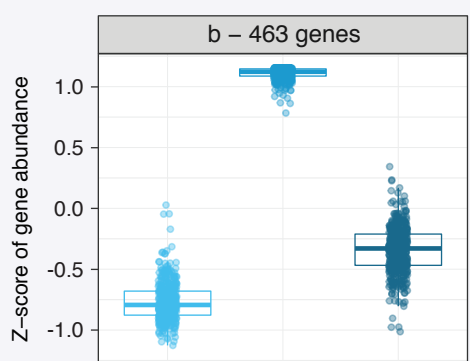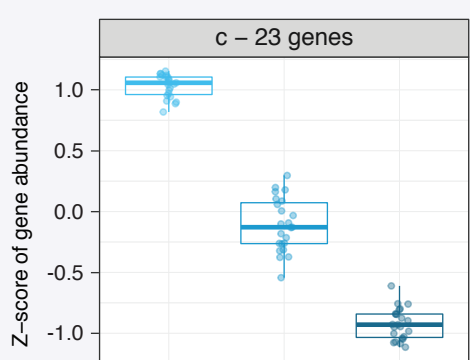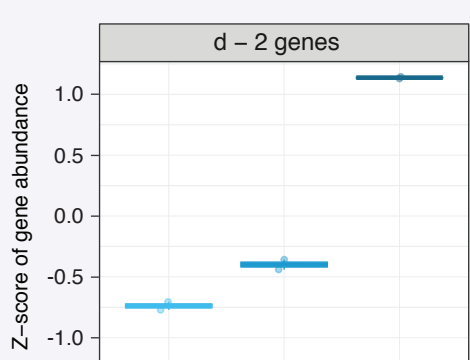

5 w testes    10 w testes    15 w testes

**B** Top functional enrichment of testes age-regulated genes (GO CC)

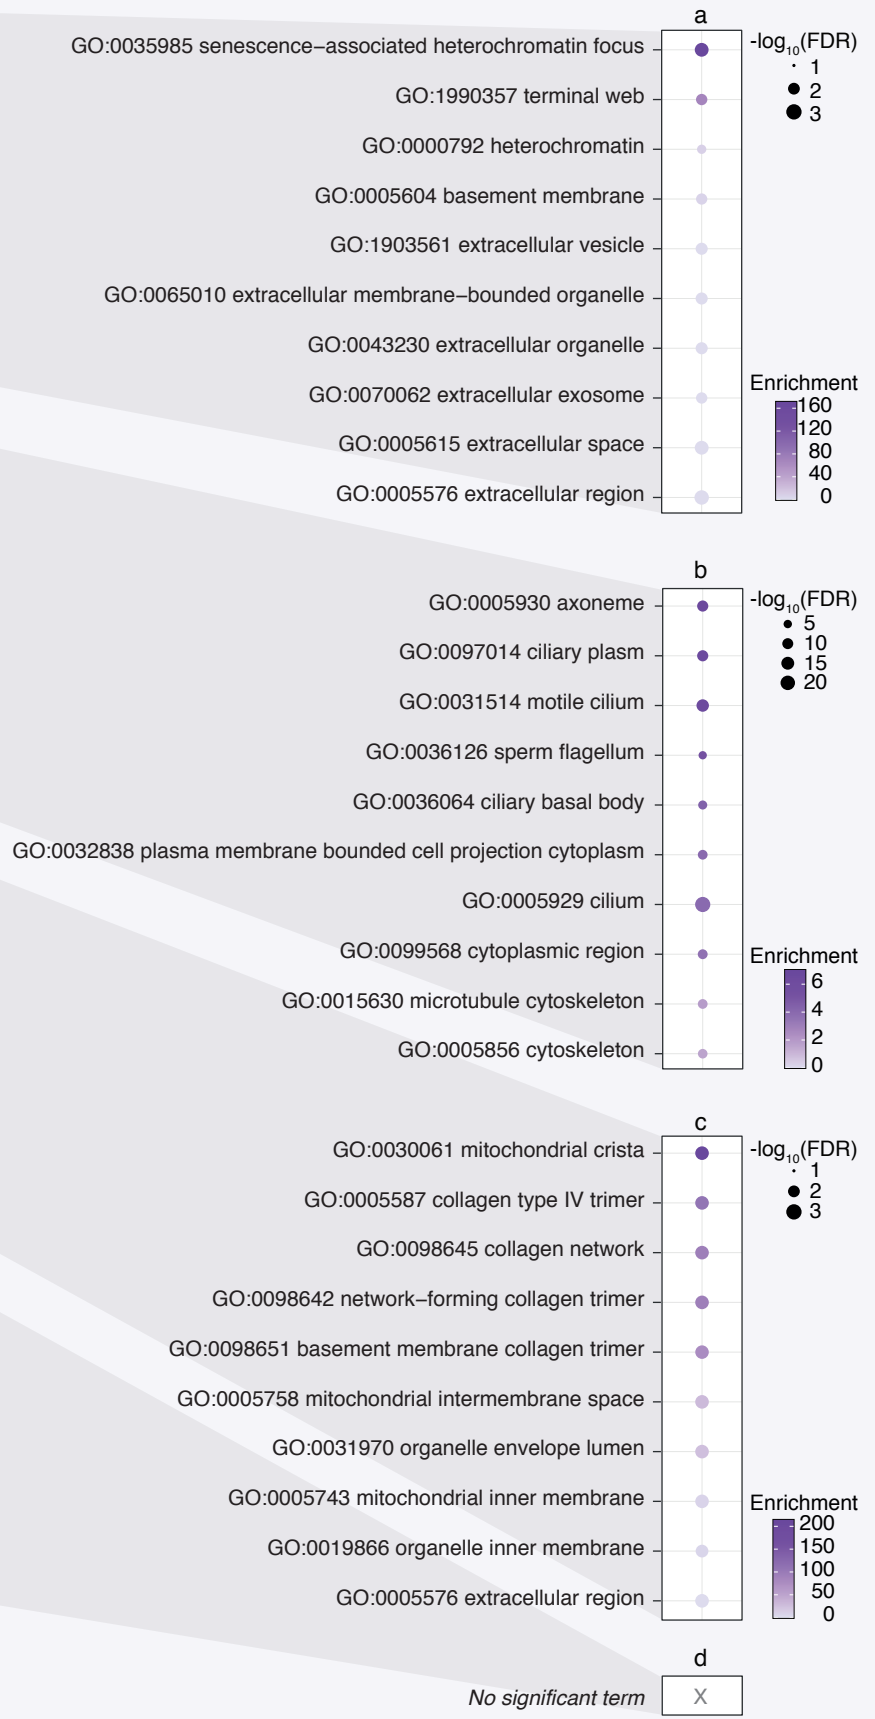

Supplement: Supplementary file [file media-5.pdf]
