# Supplementary material for: Dynamic regulation of gonadal transposon control across the lifespan of the naturally short-lived African turquoise killifish
Source: bioRxiv or medRxiv preprint supplement (doi:10.1101/2022.09.02.506427), 2022-11-29

Figure S4

**A**

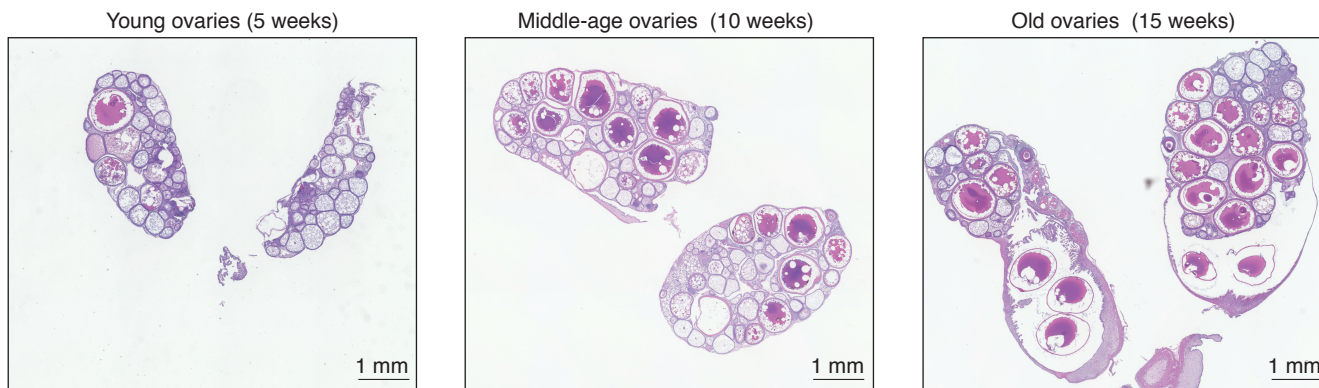

**B**

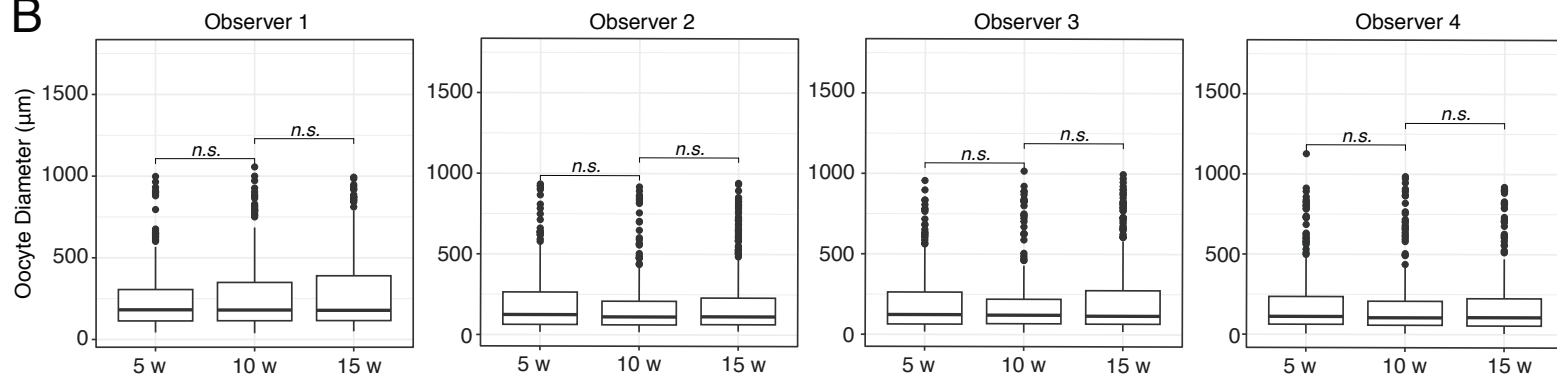

**C**

Zebrafish ovarian cell type signature expression correlation (SCP928)

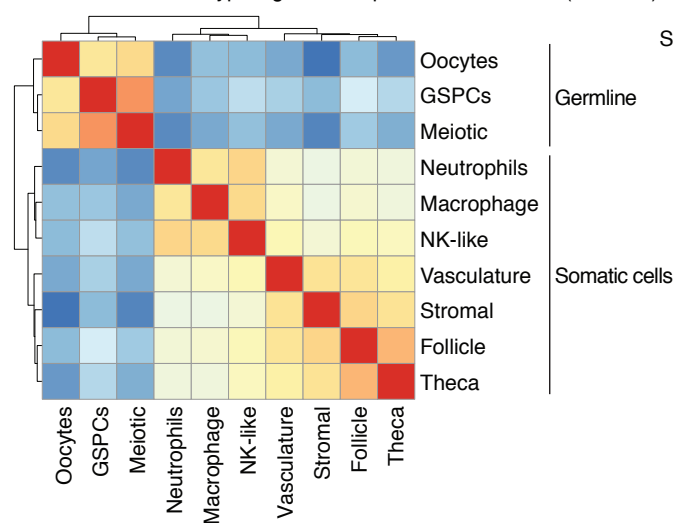

**D**

Expression of *PIWIL1* across zebrafish ovarian cell types (SCP928)

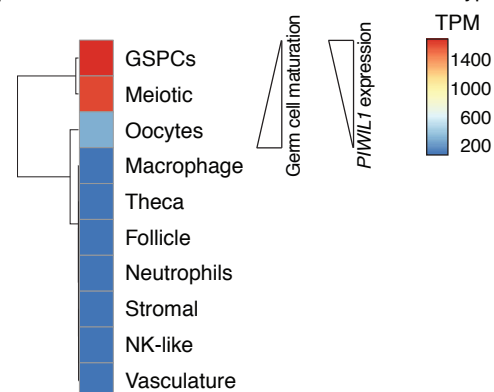

**E**

Granulator deconvolution benchmark (Zebrafish ovary pseudobulk)

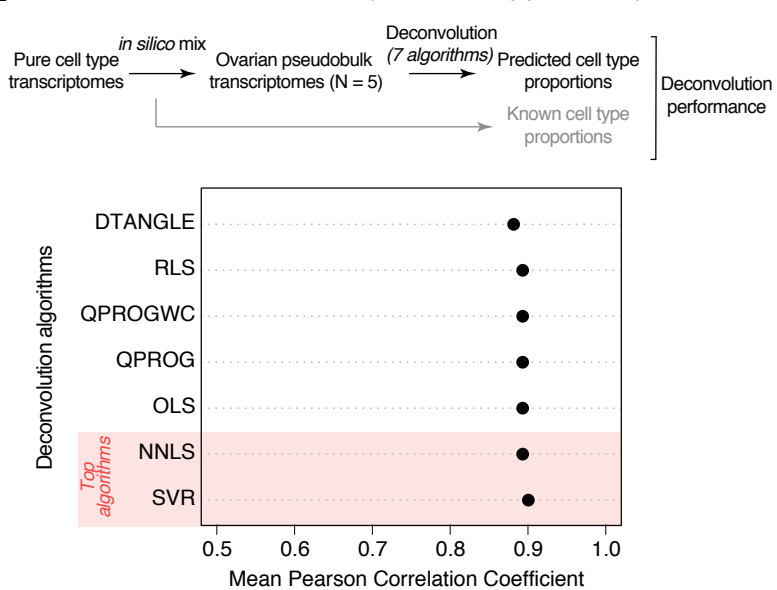

**F**

SVR deconvolution of aging killifish ovaries (*PIWIL1*-high cell proportion)

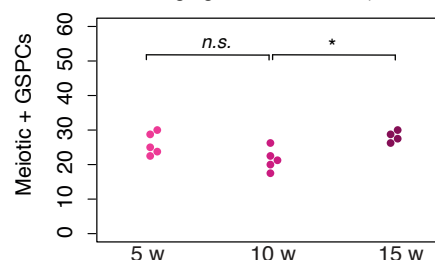

**G**

NNLS deconvolution of aging killifish ovaries (*PIWIL1*-high cell proportion)

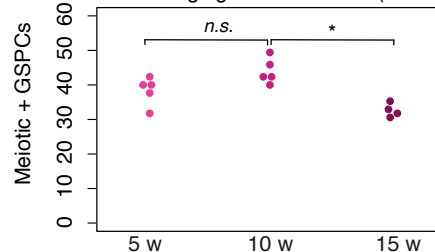

Supplement: Supplementary file [file media-6.pdf]
