# Supplementary material for: Dynamic regulation of gonadal transposon control across the lifespan of the naturally short-lived African turquoise killifish
Source: bioRxiv or medRxiv preprint supplement (doi:10.1101/2022.09.02.506427), 2022-11-29

Figure S5

**A** Boxplots of ovarian age-regulated **TEs** (FDR < 1E-6)

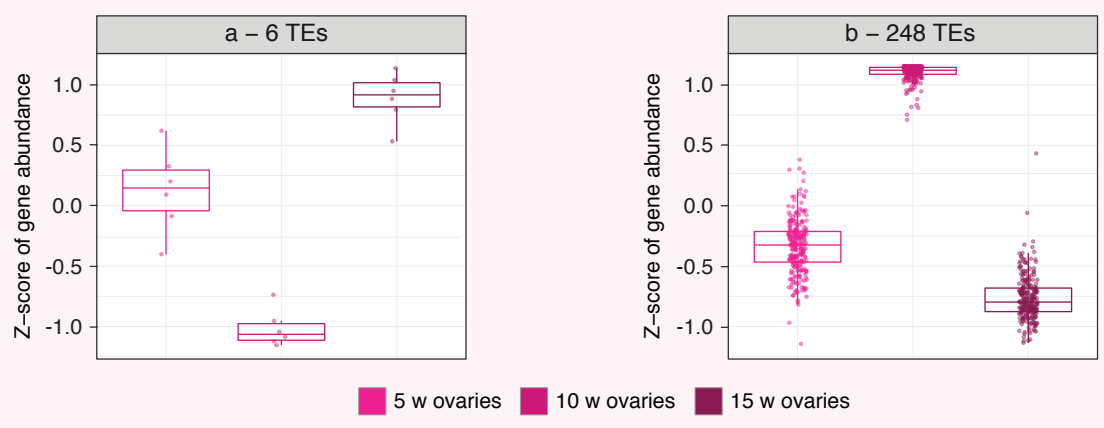

**B** Boxplots of testicular age-regulated **TEs** (FDR < 1E-6)

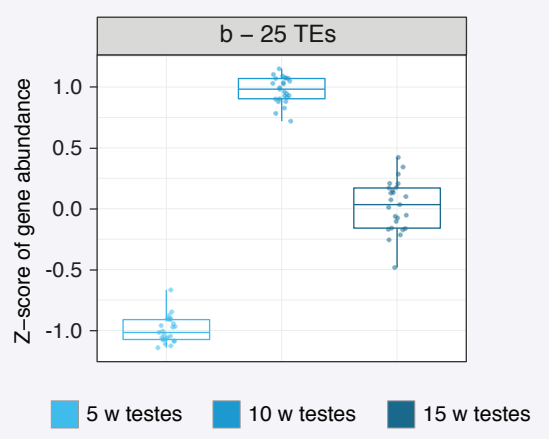

Supplement: Supplementary file [file media-7.pdf]
