# Supplementary material for: Dynamic regulation of gonadal transposon control across the lifespan of the naturally short-lived African turquoise killifish
Source: bioRxiv or medRxiv preprint supplement (doi:10.1101/2022.09.02.506427), 2022-11-29

Figure S6

**A** piRNA length distributions

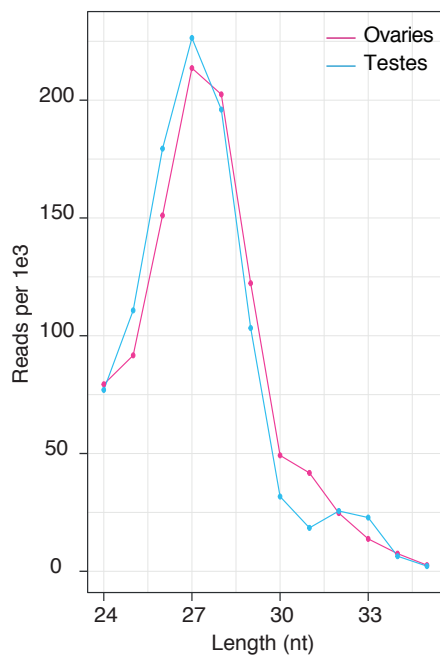

**B** Scatterplots of ovary age-regulated TE-mapped piRNAs:cognate TE mRNA expression

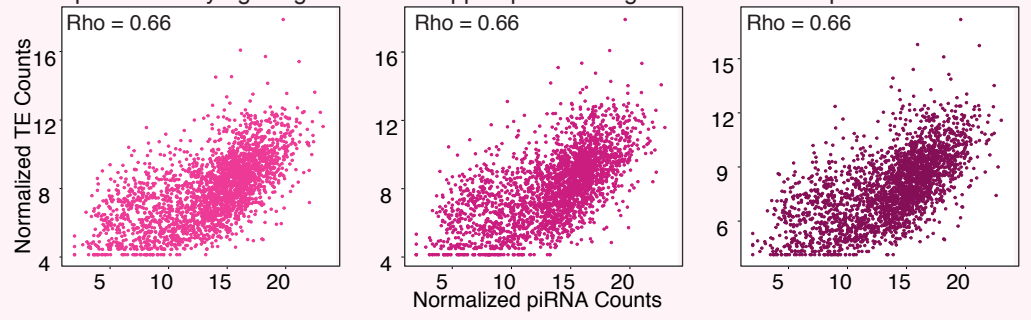

**C** Scatterplots of testes age-regulated TE-mapped piRNAs:cognate TE mRNA expression

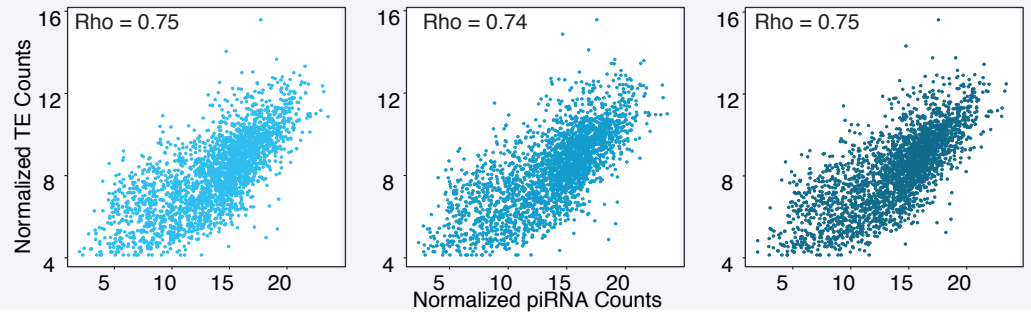

**D** Boxplots of ovary age-regulated TE-mapping piRNAs (FDR < 1E-6)

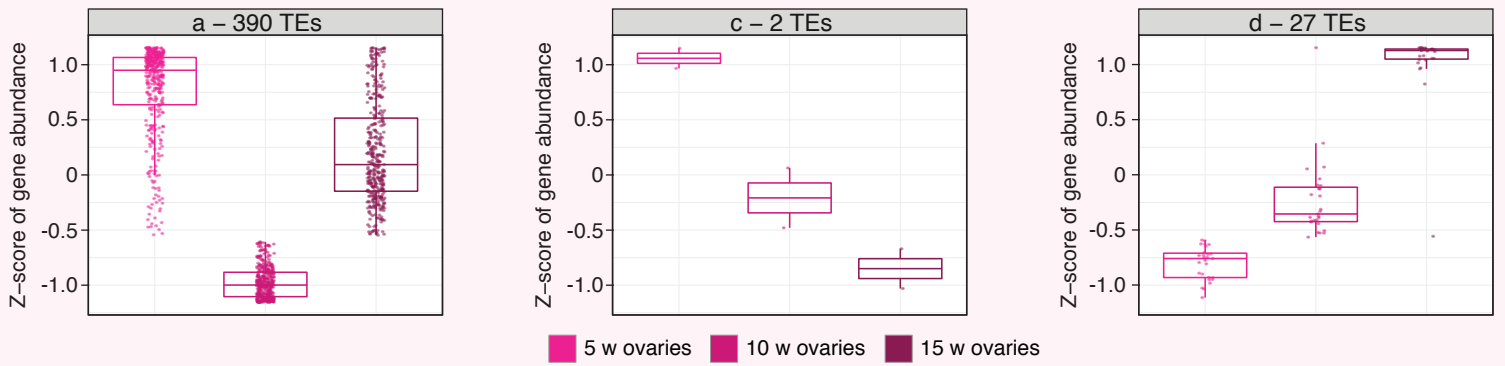

**E** Boxplots of testes age-regulated TE-mapping piRNAs (FDR < 1E-6)

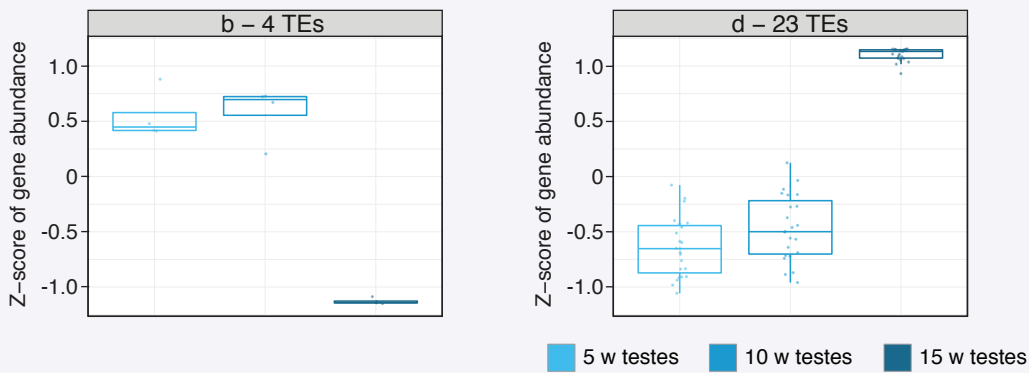

Supplement: Supplementary file [file media-8.pdf]
