# Supplementary material for: Dynamic regulation of gonadal transposon control across the lifespan of the naturally short-lived African turquoise killifish
Source: bioRxiv or medRxiv preprint supplement (doi:10.1101/2022.09.02.506427), 2022-11-29

Figure S7

**A** Median Z-scores for each ovary piRNA 5' overlap position

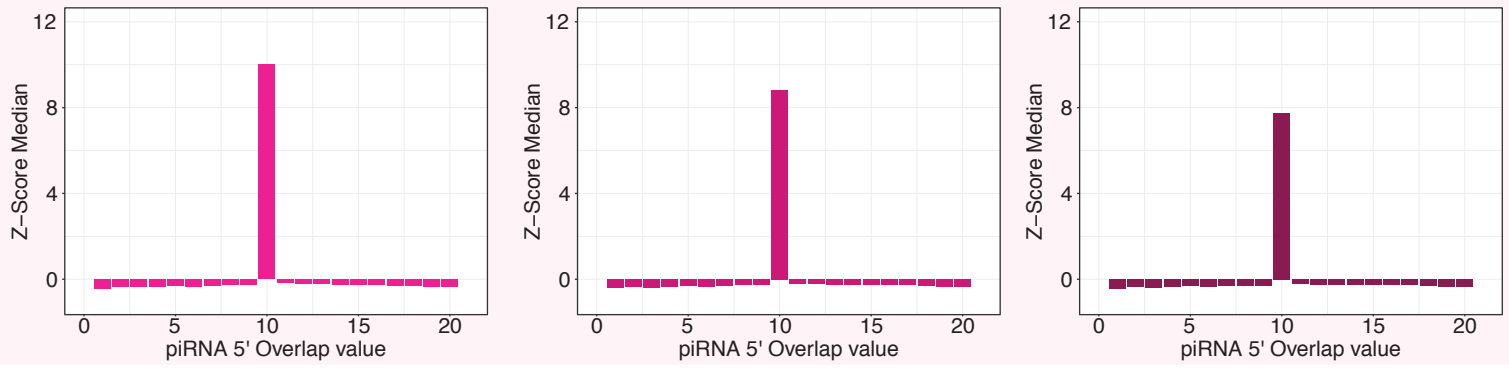

**B** Median Z-scores for each testis piRNA 5' overlap position

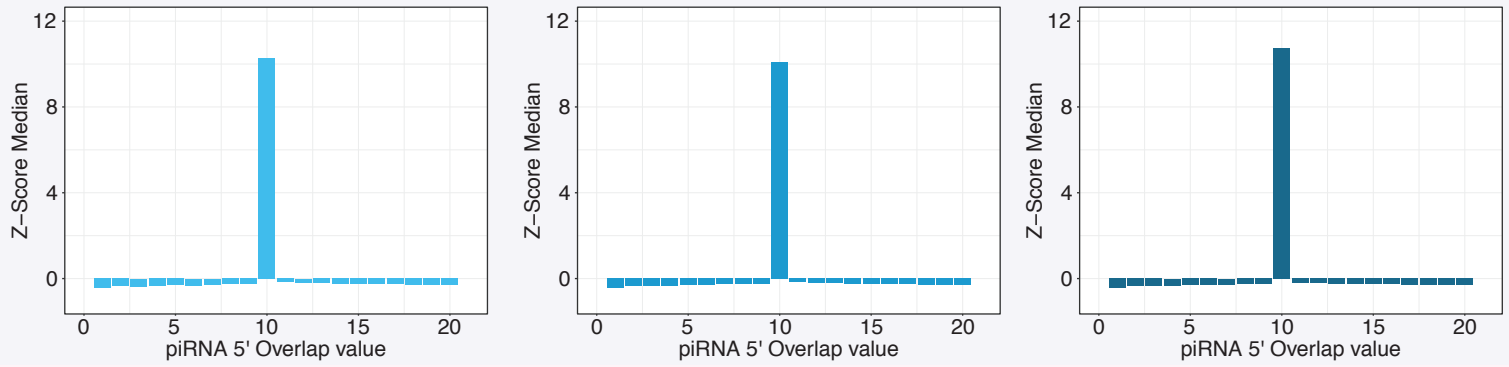

**C** Boxplots of ovary ping-pong targeted TE  $Z_{10}$  scores (FDR < 5%)

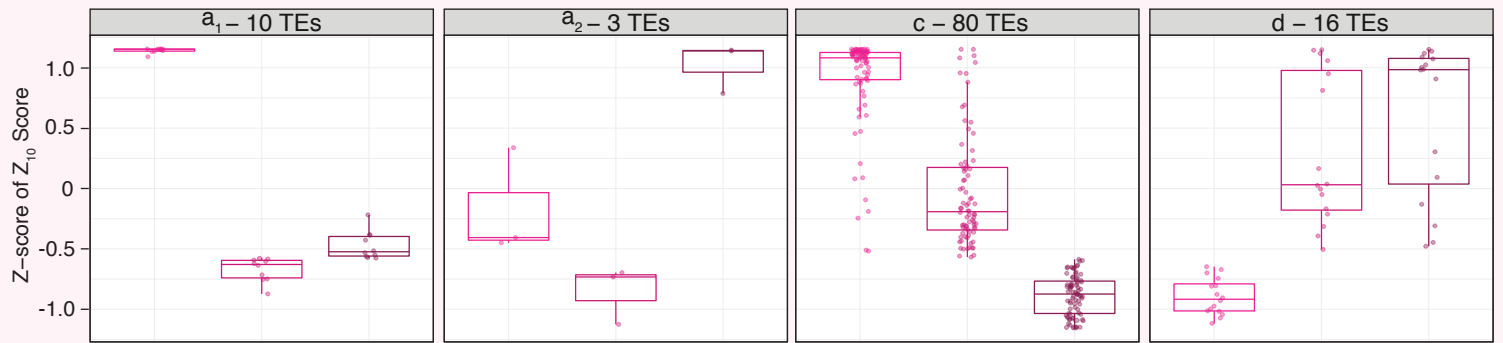

**D** Boxplots of testis ping-pong targeted TE  $Z_{10}$  scores (FDR < 5%)

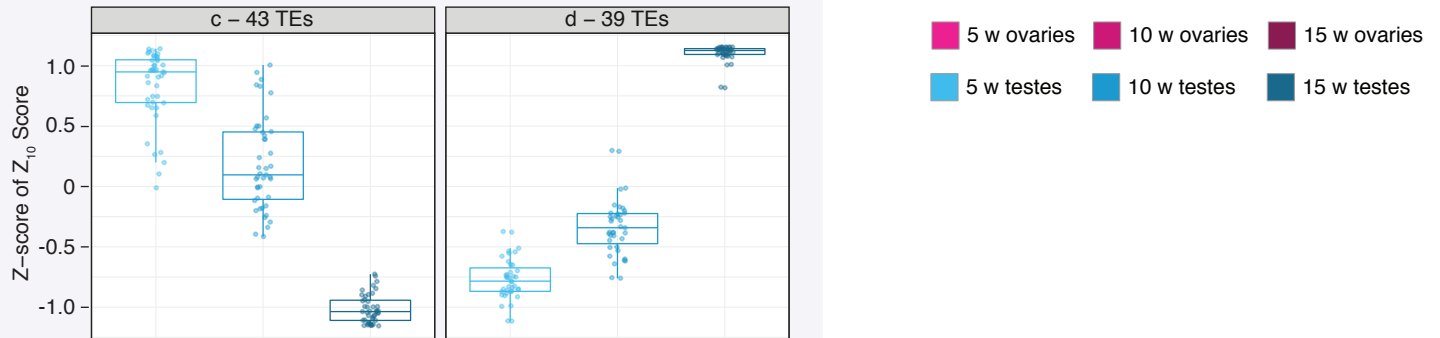

Supplement: Supplementary file [file media-9.pdf]
